# Supplementary material for: Visible light photocatalytic one pot synthesis of Z-arylvinyl halides from E-arylvinyl acids with N-halosuccinimide
Source: Royal Society of Chemistry journal article supplement (doi:10.1039/d1ra08753c), 2022-01-01

**Visible Light Photocatalytic One Pot Synthesis of  
Z-Arylvinyl Halides from E-Arylvinyl Acids with  
N-Halosuccinimide**

Qiong Yu,<sup>a</sup> Kun Yi Yu,<sup>a</sup> Cai Feng Xu<sup>a</sup> and Man-Kin Wong<sup>\*ab</sup>

<sup>a</sup>The Hong Kong Polytechnic University Shenzhen Research Institute, Shenzhen,  
518057, China

<sup>b</sup>State Key Laboratory of Chemical Biology and Drug Discovery, Department of  
Applied Biology and Chemical Technology, The Hong Kong Polytechnic University,  
Hung Hum, Hong Kong, China

**SUPPORTING INFORMATION**

## General procedure

All reagents were commercially available and used without further purification. Flash column chromatography was performed using silica gel 60 (230-400 mesh ASTM) with ethyl acetate/petroleum or methanol/dichloromethane as eluent.  $^1\text{H}$ ,  $^{13}\text{C}$  and  $^{19}\text{F}$  NMR spectra were recorded on a Bruker DPX-400 spectrometer. All chemical shifts are quoted on the scale in ppm using TMS or residual solvent as the internal standard. Coupling constants ( $J$ ) are reported in Hertz (Hz) with the following splitting abbreviations: s = singlet, br s = broad singlet, d = doublet, dd = double doublet, t = triplet and m = multiplet. High resolution mass spectra were obtained on an Agilent 6540 UHD Accurate-Mass QTOF LC/MS system equipped with an ion spray source in the positive ion mode. For ESI-MS/MS analysis, collision energy was set at 10, 15 or 20 eV.

Photocatalytic reactions were set up in light bath which are described below.

The 30 W blue LEDs was placed ~5 cm from the reaction tubes and a fan attached to the apparatus was used to maintain the temperature no more than 5 °C above room temperature.

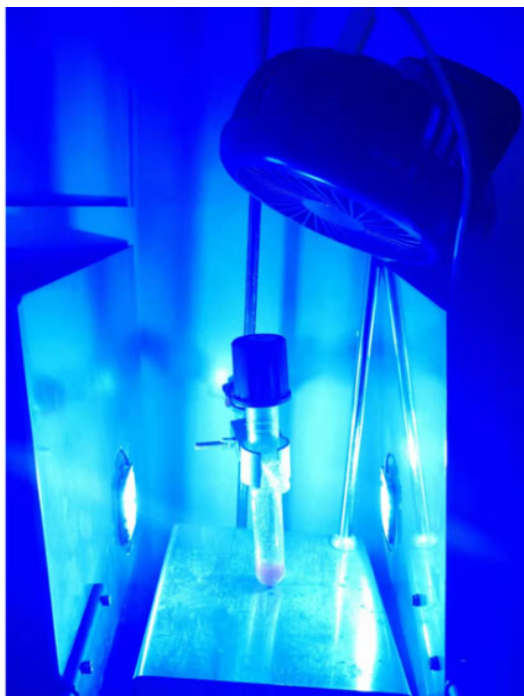

Literature references:

|                                                                                                        |                                                                                                                                                             |
|--------------------------------------------------------------------------------------------------------|-------------------------------------------------------------------------------------------------------------------------------------------------------------|
| 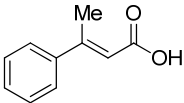 <p><b>E-1a</b></p>   | <p>T. Fukuyama, M. Arai, H. Matsubara, and I. Ryu, <i>J. Org. Chem.</i> 2004, <b>69</b>, 8105–8107.</p>                                                     |
|  <p><b>E-1b</b></p>   | <p>J. B. Metternich and Ryan Gilmour, <i>J. Am. Chem. Soc.</i> 2016, <b>138</b>, 1040–1045.</p>                                                             |
|  <p><b>E-1c</b></p>   | <p>J. B. Metternich, D. G. Artiukhin, M. C. Holland, M. v. Bremen-Kühne, J. Neugebauer and R. Gilmour, <i>J. Org. Chem.</i> 2017, <b>82</b>, 9955-9977.</p> |
|  <p><b>E-1d</b></p>   | <p>J. Gao, J. Zhang, S. Fang, J. Feng, T. Lu and D. Du, <i>Org. Lett.</i> 2020, <b>22</b>, 19, 7725–7729.</p>                                               |
|  <p><b>E-1e</b></p>  | <p>J. Gao, J. Zhang, S. Fang, J. Feng, T. Lu, and D. Du, <i>Org. Lett.</i> 2020, <b>22</b>, 7725–7729.</p>                                                  |
|  <p><b>E-1f</b></p> | <p>T. Brégent, J.-P. Bouillon and T. Poisson, <i>Org. Lett.</i> 2020, <b>22</b>, 7688–7693.</p>                                                             |
|  <p><b>E-1g</b></p> | <p>T. Brégent, J.-P. Bouillon and T. Poisson, <i>Org. Lett.</i> 2020, <b>22</b>, 7688–7693.</p>                                                             |
|  <p><b>E-1j</b></p> | <p>J. B. Metternich and Ryan Gilmour, <i>J. Am. Chem. Soc.</i> 2016, <b>138</b>, 1040–1045.</p>                                                             |
|  <p><b>E-1k</b></p> | <p>A. Pesyan and M. F. Balandrin, <i>U. S. Pat. Appl. Publ.</i> 2021, US 20210130285.</p>                                                                   |
|  <p><b>E-1n</b></p> | <p>T. Brégent, J.-P. Bouillon and T. Poisson, <i>Org. Lett.</i> 2020, <b>22</b>, 7688–7693.</p>                                                             |

|                                                                                                                                                |                                                                                                 |
|------------------------------------------------------------------------------------------------------------------------------------------------|-------------------------------------------------------------------------------------------------|
| 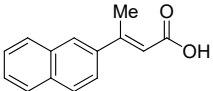 <p style="text-align: center;"><b>E-1o</b></p>               | <p>J. B. Metternich and Ryan Gilmour, <i>J. Am. Chem. Soc.</i> 2016, <b>138</b>, 1040–1045.</p> |
|  <p style="text-align: center;"><b>Z-2a</b></p>               | <p>H. Zhang, Q. Xu, L. Yu and S. Yu, <i>Eur. J. Org. Chem.</i> 2020, 1472.</p>                  |
|  <p style="text-align: center;"><b>Z-2b</b></p>               | <p>H. Zhang, Q. Xu, L. Yu and S. Yu, <i>Eur. J. Org. Chem.</i> 2020, 1472.</p>                  |
|  <p style="text-align: center;"><b>Z-2c</b></p>               | <p>H. Zhang, Q. Xu, L. Yu and S. Yu, <i>Eur. J. Org. Chem.</i> 2020, 1472.</p>                  |
|  <p style="text-align: center;"><b>Z-2d</b></p>               | <p>H. Zhang, Q. Xu, L. Yu and S. Yu, <i>Eur. J. Org. Chem.</i> 2020, 1472.</p>                  |
|  <p style="text-align: center;"><b>Z-2f</b></p>              | <p>H. Zhang, Q. Xu, L. Yu and S. Yu, <i>Eur. J. Org. Chem.</i> 2020, 1472.</p>                  |
|  <p style="text-align: center;"><b>Z-2j<sup>b</sup></b></p> | <p>H. Zhang, Q. Xu, L. Yu and S. Yu, <i>Eur. J. Org. Chem.</i> 2020, 1472.</p>                  |
|  <p style="text-align: center;"><b>Z-2m</b></p>             | <p>H. Zhang, Q. Xu, L. Yu and S. Yu, <i>Eur. J. Org. Chem.</i> 2020, 1472.</p>                  |
|  <p style="text-align: center;"><b>Z-4</b></p>              | <p>H. Zhang, Q. Xu, L. Yu and S. Yu, <i>Eur. J. Org. Chem.</i> 2020, 1472.</p>                  |
|  <p style="text-align: center;"><b>Z-5</b></p>              | <p>H. Zhang, Q. Xu, L. Yu and S. Yu, <i>Eur. J. Org. Chem.</i> 2020, 1472.</p>                  |

**Table S1** Solvent effect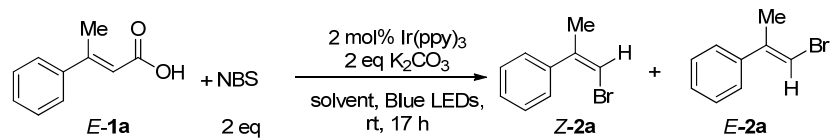

| Entry | solvent                     | SM% | Yield% | Z/E   |
|-------|-----------------------------|-----|--------|-------|
| 1     | H <sub>2</sub> O            | 0   | 59     | 75/25 |
| 2     | MeOH: H <sub>2</sub> O =1:1 | 0   | 29     | 93/7  |
| 3     | EtOH                        | 40  | 36     | 6/94  |
| 4     | <i>n</i> BuOH               | 0   | 47     | 89/11 |
| 5     | dioxane                     | 37  | 0      | -     |
| 6     | THF                         | 34  | Trace  | -     |
| 7     | CH <sub>3</sub> CN          | 0   | 84     | 2/98  |
| 8     | DMF                         | 2   | 0      | -     |
| 9     | DMSO                        | 29  | 4      | 75/25 |

<sup>a</sup> Reaction conditions: Treatment of *E*-1a (0.2 mmol), K<sub>2</sub>CO<sub>3</sub> (0.4 mmol), NBS (0.4 mmol) and Ir(ppy)<sub>3</sub> (2 mol%) in 2 mL of solvent under N<sub>2</sub> and blue LEDs light for 17 hours at room temperature. <sup>b</sup> Yield was determined by <sup>1</sup>H NMR using dibromomethane as internal standard. <sup>c</sup> The Z/E ratio was determined by <sup>1</sup>H NMR spectroscopy.

**Table S2** Synthetic routes of  $\alpha,\beta$ -unsaturated arylvinyl acids *E*-1a to *E*-1o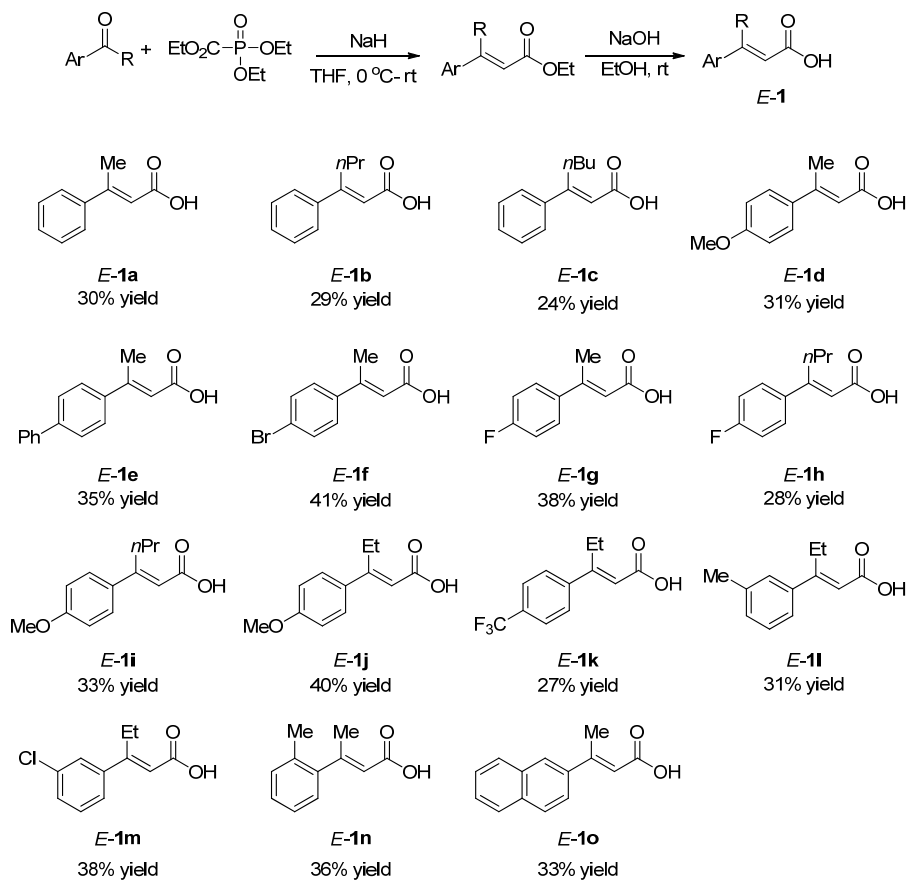

### General procedure for synthesis of $\alpha,\beta$ -unsaturated arylvinyl acids *E-1*

(1) To a suspension of NaH (480 mg, 60% in mineral oil, 12 mmol) in THF (10 mL), a solution of triethyl phosphonoacetate (2.5 mL, 12 mmol) in THF (5 mL) was slowly added. The mixture was stirred at room temperature for 30 min. Then, ketone (10 mmol) in THF (5 mL) was added at 0 °C, and the mixture was stirred at room temperature. After confirmation of consumption of ketone by TLC, a solution of saturated aqueous sodium bicarbonate (15 mL) was added. The mixture was extracted with EtOAc (3 x 25 mL), washed with brine (15 mL) and dried over Mg<sub>2</sub>SO<sub>4</sub>. After concentration of the organic phase, the residue was purified by silica-gel column chromatography (Petroleum ether/EtOAc as eluent).

(2) The  $\alpha,\beta$ -unsaturated ester was placed in a 50 mL round-bottom flask, then EtOH (0.5M) was added, the reaction mixture was stirred, and NaOH (5 equiv.) was added. The reaction mixture was stirred at room temperature until no starting material was detected by TLC. Then the pH was adjusted to 1.0 with HCl (1 M). The mixture was extracted with EtOAc. The combined organic layer was washed with saturated NaCl solution, dried over MgSO<sub>4</sub>, and concentrated in vacuum. If needed, the crude residue was subjected to flash chromatography (Petroleum ether/EtOAc) or recrystallize.

#### *E*-3-(4-fluorophenyl)-2-hexenoic acid *E-1h*

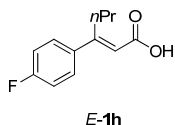

Colorless solid, 28% yield for two steps

<sup>1</sup>H NMR (400 MHz, CDCl<sub>3</sub>)  $\delta$  7.51 – 7.36 (m, 2H), 7.08 (t, *J* = 8.6 Hz, 2H), 6.04 (s, 1H), 3.09 (t, *J* =

8.0 Hz, 2H), 1.56 – 1.37 (m, 2H), 0.94 (t,  $J = 7.4$  Hz, 3H).

$^{13}\text{C}$  NMR (100 MHz,  $\text{CDCl}_3$ )  $\delta$  172.17, 163.31(d,  $J = 248$  Hz), 162.38, 137.13 (d,  $J = 3.5$  Hz),

128.55 (d,  $J = 8.4$  Hz), 116.75, 115.53 (d,  $J = 21.7$  Hz), 32.90, 22.25, 13.91.

$^{19}\text{F}$  NMR (376 MHz,  $\text{CDCl}_3$ )  $\delta$  -112.10.

**HRMS** (ESI) calcd for  $\text{C}_{12}\text{H}_{12}\text{FO}_2^-$  (M - H) $^-$  207.0827, found 207.0822.

*E*-3-(4-methoxyphenyl)-2-hexenoic acid **E-1i**

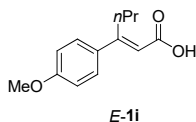

Colorless solid, 33% yield for two steps

$^1\text{H}$  NMR (400 MHz,  $\text{CDCl}_3$ )  $\delta$  7.44 (dt,  $J = 8.0, 2.0$  Hz, 2H), 6.91 (dt,  $J = 8.0, 2.0$  Hz, 2H), 6.06 (s,

1H), 3.84 (s, 2H), 3.10 (t,  $J = 8.0$  Hz, 1H), 1.65 – 1.26 (m, 1H), 0.95 (t,  $J = 7.4$  Hz, 2H).

$^{13}\text{C}$  NMR (100 MHz,  $\text{CDCl}_3$ )  $\delta$  172.35, 162.90, 160.56, 133.16, 128.11, 114.95, 113.91, 55.27,

32.55, 22.52, 14.01.

**HRMS** (ESI) calcd for  $\text{C}_{13}\text{H}_{15}\text{O}_3^-$  (M - H) $^-$  219.1027, found 219.1023.

*E*-3-(3-methylphenyl)-2-pentenoic acid **E-1l**

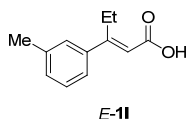

Colorless solid, 31% yield for two steps

$^1\text{H}$  NMR (400 MHz,  $\text{CDCl}_3$ )  $\delta$  7.30-7.22 (m, 3H), 7.21-7.13(m, 1H), 6.05 (s, 1H), 3.12 (q,  $J = 7.2$

Hz, 2H), 2.37 (s, 3H), 1.09 (t,  $J = 7.4$  Hz, 3H).

$^{13}\text{C}$  NMR (100 MHz,  $\text{CDCl}_3$ )  $\delta$  172.29, 165.26, 140.90, 138.15, 129.94, 128.42, 127.43, 123.86, 115.89, 24.56, 21.41, 13.60.

HRMS (ESI) calcd for  $\text{C}_{12}\text{H}_{13}\text{O}_2^-$  (M - H) $^-$  189.0921, found 189.0915.

*E*-3-(3-chlorophenyl)-2-pentenoic acid ***E*-1m**

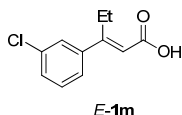

Colorless solid, 38% yield for two steps

$^1\text{H}$  NMR (400 MHz,  $\text{CDCl}_3$ )  $\delta$  7.44 (s, 1H), 7.39 – 7.29 (m, 3H), 6.04 (s, 1H), 3.10 (q,  $J$  = 7.5 Hz, 2H), 1.09 (t,  $J$  = 7.5 Hz, 3H).

$^{13}\text{C}$  NMR (100 MHz,  $\text{CDCl}_3$ )  $\delta$  171.83, 163.38, 142.76, 134.59, 129.82, 129.14, 126.90, 124.93, 117.04, 24.53, 13.43.

HRMS (ESI) calcd for  $\text{C}_{11}\text{H}_{10}\text{ClO}_2^-$  (M - H) $^-$  209.0375, found 209.0370.

## 2. General procedure for synthesis of $\alpha,\beta$ -unsaturated arylvinyl halides ***Z*-2**

The specified *E*-arylvinyl acids ***E*-1** (0.2 mmol, 1.0 eq.), NXS (0.4 mmol, 2.0 eq),  $\text{K}_2\text{CO}_3$  (0.4 mmol, 2.0 eq) and  $\text{fac-Ir}(\text{ppy})_3$  (2.6 mg, 0.004 mmol, 0.02 eq.) were added in a 10-mL reaction tube. The tube was evacuated and backfilled with nitrogen 3 times. Methanol (2.0 mL) was then added via syringe under nitrogen. The mixture was then irradiated by 30 W blue LEDs. After the reaction was completed,  $\text{H}_2\text{O}$  (5 mL) was added. The mixture was extracted with  $\text{CH}_2\text{Cl}_2$  (3 x 15 mL), washed with brine (10 mL) and dried over  $\text{Mg}_2\text{SO}_4$ . After concentration of the organic phase, the residue was purified by silica-gel column chromatography (Petroleum ether as eluent) to afford the desired product. The *Z/E* ratio of the mixture was determined by the  $^1\text{H}$  NMR spectra.



### Z-(1-bromoprop-1-en-2-yl)benzene (Z-2a)

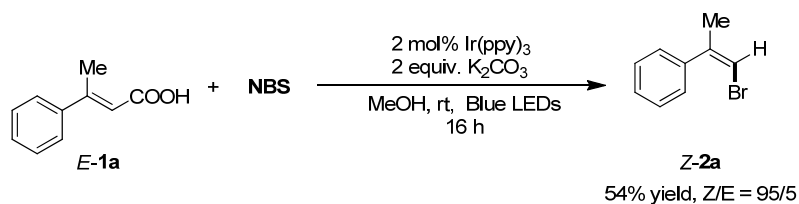

Colorless oil

$^1\text{H NMR}$  (400 MHz,  $\text{CDCl}_3$ )  $\delta$  7.44 – 7.36 (m, 2H), 7.37 – 7.29 (m, 3H), 6.24 (d,  $J = 1.1$  Hz, 1H), 2.14 (d,  $J = 1.1$  Hz, 3H).

### Z-(1-bromopent-1-en-2-yl)benzene (Z-2b)

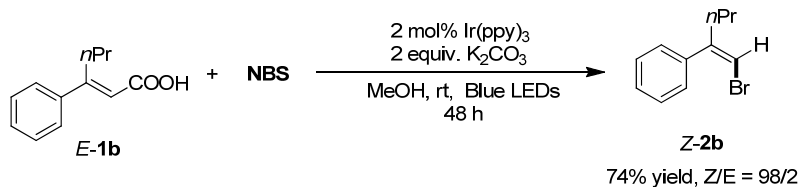

Colorless oil

$^1\text{H NMR}$  (400 MHz,  $\text{CDCl}_3$ )  $\delta$  7.38 – 7.32 (m, 2H), 7.29 (dt,  $J = 4.8, 2.0$  Hz, 1H), 7.25 – 7.18 (m, 2H), 6.20 (s, 1H), 2.39 (td,  $J = 7.6, 1.1$  Hz, 2H), 1.37-1.29 (m, 2H), 0.85 (t,  $J = 7.3$  Hz, 3H).

### Z-(1-bromohex-1-en-2-yl)benzene (Z-2c)

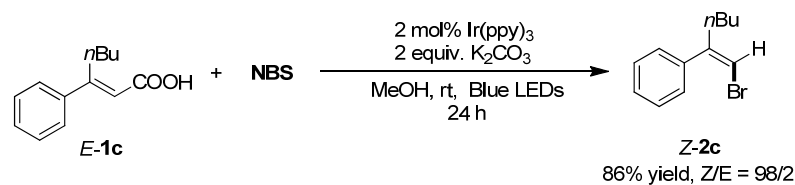

Colorless oil

$^1\text{H NMR}$  (400 MHz,  $\text{CDCl}_3$ )  $\delta$  7.40-7.34 (m, 2H), 7.33 – 7.28 (m, 1H), 7.26 – 7.22 (m, 2H), 6.22 (t,  $J = 1.2$  Hz, 1H), 2.43 (td,  $J = 7.2, 1.1$  Hz, 2H), 1.35 – 1.24 (m, 4H), 0.85 (t,  $J = 7.0$  Hz, 3H).

### Z-(1-bromoprop-1-en-2-yl)-4-methylbenzene (Z-2d)

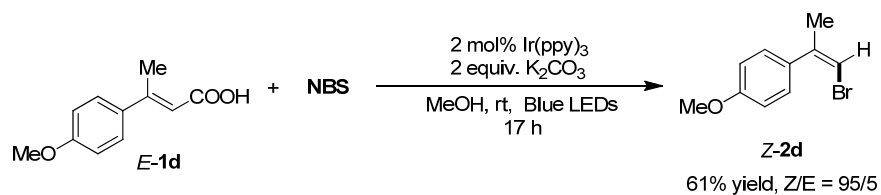

Colorless oil

<sup>1</sup>H NMR (400 MHz, CDCl<sub>3</sub>) δ 7.23 (d, *J* = 8.4 Hz, 2H), 6.83 (d, *J* = 8.4 Hz, 2H), 6.10 (s, 1H),

3.74 (s, 3H), 2.02 (s, 3H).

<sup>13</sup>C NMR (100 MHz, CDCl<sub>3</sub>) δ 158.91, 140.78, 132.22, 128.94, 113.45, 100.79, 55.17, 24.91.

HRMS (ESI) calcd for C<sub>10</sub>H<sub>12</sub>BrO<sup>+</sup> (M + H)<sup>+</sup> 227.0066, found 227.0066.

### Z-(1-bromoprop-1-en-2-yl)-4-phenylbenzene (Z-2e)

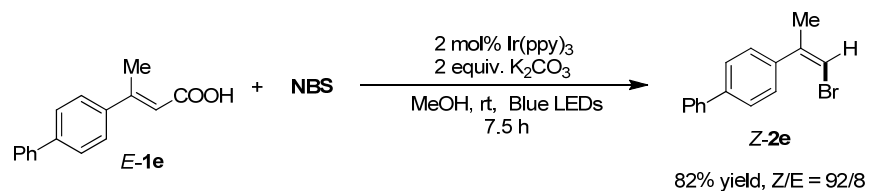

Colorless oil

<sup>1</sup>H NMR (400 MHz, CDCl<sub>3</sub>) δ 7.71 – 7.58 (m, 4H), 7.52 – 7.43 (m, 4H), 7.39 (t, *J* = 7.3 Hz, 1H),

6.30 (s, 1H), 2.20 (s, 3H).

<sup>13</sup>C NMR (100 MHz, CDCl<sub>3</sub>) δ 140.96, 140.62, 140.39, 138.92, 128.73, 128.11, 127.33, 127.02,

126.81, 101.58, 24.87.

HRMS (ESI) calcd for C<sub>15</sub>H<sub>14</sub>Br<sup>+</sup> (M + H)<sup>+</sup> 273.0273, found 273.0272.

### Z-(1-bromoprop-1-en-2-yl)-4-bromobenzene (Z-2f)

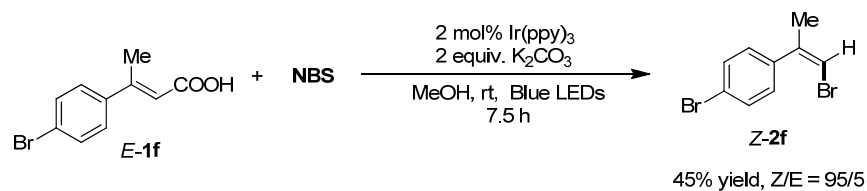

Colorless oil

<sup>1</sup>H NMR (400 MHz, CDCl<sub>3</sub>) δ 7.51 (d, *J* = 8.4 Hz, 2H), 7.21 (d, *J* = 8.4 Hz, 2H), 6.25 (d, *J* = 1.4 Hz, 1H), 2.10 (d, *J* = 1.4 Hz, 3H).

### Z-(1-bromoprop-1-en-2-yl)-4-fluorobenzene (Z-2g)

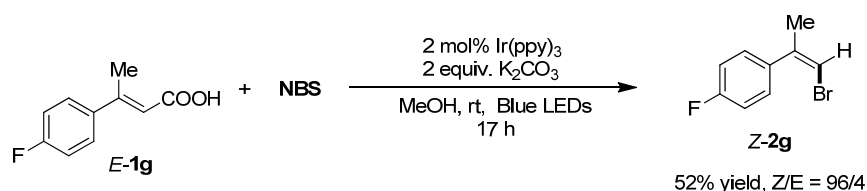

Colorless oil

<sup>1</sup>H NMR (400 MHz, CDCl<sub>3</sub>) δ 7.36 – 7.28 (m, 2H), 7.12 – 7.03 (m, 2H), 6.24 (d, *J* = 1.4 Hz, 1H), 2.12 (d, *J* = 1.5 Hz, 3H).

<sup>13</sup>C NMR (100 MHz, CDCl<sub>3</sub>) δ 162.02 (d, *J* = 246.7 Hz), 140.52, 135.95 (d, *J* = 3.2 Hz), 129.45 (d, *J* = 8.0 Hz), 115.11 (d, *J* = 21.6 Hz), 101.86, 24.93.

<sup>19</sup>F NMR (376 MHz, CDCl<sub>3</sub>) δ -114.03.

HRMS (ESI) calcd for C<sub>9</sub>H<sub>9</sub>BrF<sup>+</sup>(M + H)<sup>+</sup> 214.9866, found 214.9866.

### Z-(1-bromopent-1-en-2-yl)-4-fluorobenzene (Z-2h)

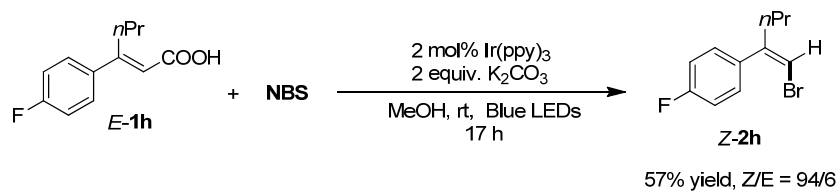

Colorless oil

$^1\text{H NMR}$  (400 MHz,  $\text{CDCl}_3$ )  $\delta$  7.30 – 7.21 (m, 2H), 7.15 – 7.03 (m, 2H), 6.25 (t,  $J = 1.2$  Hz, 1H),

2.42 (td,  $J = 4, 1.6$  Hz, 2H), 1.43 – 1.26 (m, 4H), 0.90 (t,  $J = 7.4$  Hz, 3H).

$^{13}\text{C NMR}$  (100 MHz,  $\text{CDCl}_3$ )  $\delta$  162.02 (d,  $J = 246.4$  Hz), 145.41, 135.21 (d,  $J = 3.5$  Hz), 129.77

(d,  $J = 8.1$  Hz), 115.16 (d,  $J = 21.6$  Hz), 102.39, 40.86, 20.76, 13.33.

$^{19}\text{F NMR}$  (376 MHz,  $\text{CDCl}_3$ )  $\delta$  -114.38.

**HRMS** (ESI) calcd for  $\text{C}_{11}\text{H}_{13}\text{BrF}^+ (\text{M} + \text{H})^+$  243.0179, found 243.0171.

### Z-(1-bromopent-1-en-2-yl)-4-methoxybenzene (Z-2i)

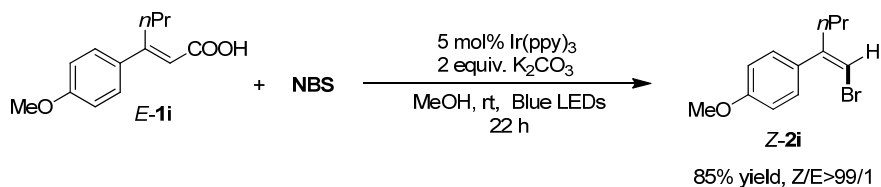

Colorless oil

$^1\text{H NMR}$  (400 MHz,  $\text{CDCl}_3$ )  $\delta$  7.22 (dt,  $J = 8.8, 2.4$  Hz, 2H), 6.92 (dt,  $J = 8.8, 2.4$  Hz, 2H), 6.19 (s,

1H), 3.83 (s, 3H), 2.41 (td,  $J = 8.0, 1.2$  Hz, 2H), 1.35 (q,  $J = 7.5$  Hz, 2H), 0.88 (t,  $J = 7.4$  Hz, 3H).

$^{13}\text{C NMR}$  (100 MHz,  $\text{CDCl}_3$ )  $\delta$  158.82, 145.76, 131.46, 129.25, 113.49, 101.47, 55.15, 40.84,

20.86, 13.34.

**HRMS** (ESI) calcd for  $\text{C}_{12}\text{H}_{16}\text{BrO}^+ (\text{M} + \text{H})^+$  255.0379, found 255.0382.

### Z-(1-bromobut-1-en-2-yl)-4-methoxybenzene (Z-2j)

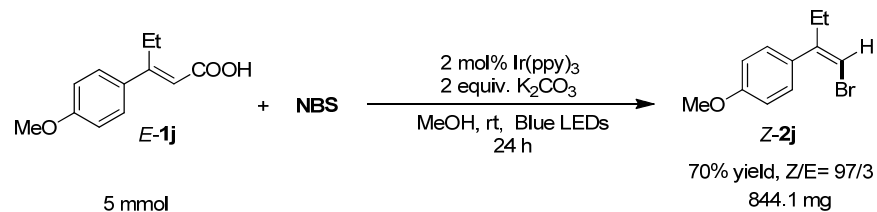

Colorless oil

$^1\text{H NMR}$  (400 MHz,  $\text{CDCl}_3$ )  $\delta$  7.21 (dt,  $J = 8.8, 2.4$  Hz, 2H), 6.91 (dt,  $J = 8.8, 2.4$  Hz, 2H), 6.19 (s, 1H), 3.83 (s, 3H), 2.44 (qd,  $J = 7.4, 1.3$  Hz, 2H), 0.99 (t,  $J = 7.4$  Hz, 3H).

### Z-(1-bromobut-1-en-2-yl)-3-methylbenzene (Z-2l)

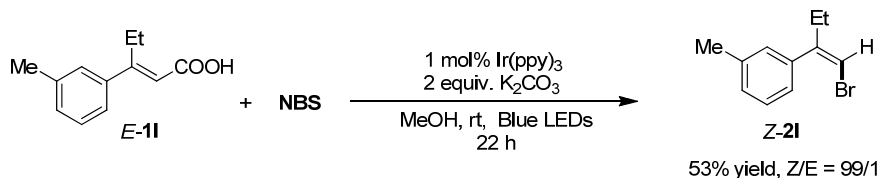

Colorless oil

$^1\text{H NMR}$  (400 MHz,  $\text{CDCl}_3$ )  $\delta$  7.29 (t,  $J = 7.8$  Hz, 1H), 7.15 (d,  $J = 7.6$  Hz, 1H), 7.07 (d,  $J = 7.1$  Hz, 2H), 6.23 (s, 1H), 2.47 (q,  $J = 7.4$  Hz, 2H), 2.40 (s, 3H), 1.03 (t,  $J = 7.4$  Hz, 4H).

$^{13}\text{C NMR}$  (100 MHz,  $\text{CDCl}_3$ )  $\delta$  148.14, 139.56, 137.71, 128.46, 128.21, 128.01, 125.05, 101.30, 32.12, 1.44, 12.68.

HRMS (ESI) calcd for  $\text{C}_{11}\text{H}_{14}\text{Br}^+$  ( $\text{M} + \text{H}$ ) $^+$  225.0273, found 225.0272.

### Z-(1-bromobut-1-en-2-yl)-3-chlorobenzene (Z-2m)

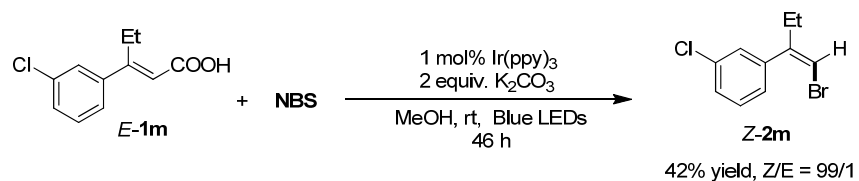

Colorless oil

$^1\text{H NMR}$  (400 MHz,  $\text{CDCl}_3$ )  $\delta$  7.34 – 7.27 (m, 2H), 7.23 (s, 1H), 7.12 (d,  $J = 6.7$  Hz, 1H), 6.25 (s, 1H), 2.43 (q,  $J = 7.4$  Hz, 2H), 1.00 (t,  $J = 7.4$  Hz, 3H).

### Z-(1-bromoprop-1-en-2-yl)naphthalene (Z-2o)

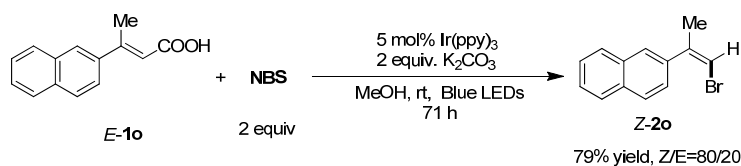

Colorless oil

$^1\text{H NMR}$  (400 MHz,  $\text{CDCl}_3$ )  $\delta$  7.92 – 7.86 (m, 3H), 7.83 (s, 1H), 7.56 – 7.47 (m, 3H), 7.28 (s, 1H), 6.35 (d,  $J = 1.4$  Hz, 1H), 2.25 (d,  $J = 1.4$  Hz, 3H).

$^{13}\text{C NMR}$  (100 MHz,  $\text{CDCl}_3$ )  $\delta$  141.53, 137.63, 133.10, 132.68, 128.04, 127.74, 127.68, 126.69, 126.13, 125.74, 101.90, 25.04.

**HRMS** (ESI) calcd for  $\text{C}_{13}\text{H}_{12}\text{Br}^+$  ( $\text{M} + \text{H}$ ) $^+$  247.0117, found 247.0116.

### Z-(1-chloroprop-1-en-2-yl)-4-methoxybenzene (Z-2p)

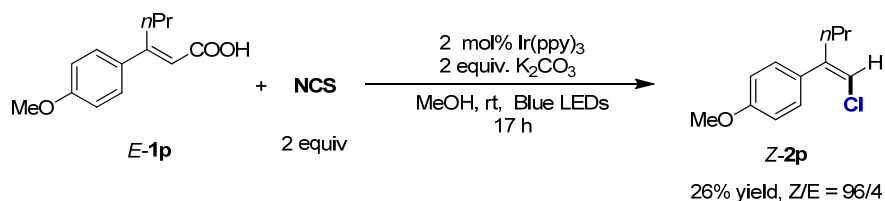

Colorless oil

$^1\text{H NMR}$  (400 MHz,  $\text{CDCl}_3$ )  $\delta$  7.27 (d,  $J = 8.7$  Hz, 2H), 6.94 (d,  $J = 8.7$  Hz, 2H), 6.09 (s, 1H), 3.85 (s, 4H), 2.40 (t,  $J = 6.9$  Hz, 2H), 1.40-1.32 (m, 2H), 0.89 (t,  $J = 7.3$  Hz, 3H).

$^{13}\text{C}$  NMR (100 MHz,  $\text{CDCl}_3$ )  $\delta$  158.82, 142.36, 129.95, 129.42, 113.52, 112.39, 55.17, 39.30, 20.93, 13.37.

HRMS (ESI) calcd for  $\text{C}_{12}\text{H}_{16}\text{ClO}^+$  ( $\text{M} + \text{H}$ ) $^+$  211.0884, found 211.0887.

### 3. Derivatization of Z-2j

#### Z-4,4'-(but-1-ene-1,2-diyl)bis(methoxybenzene) (Z-4)

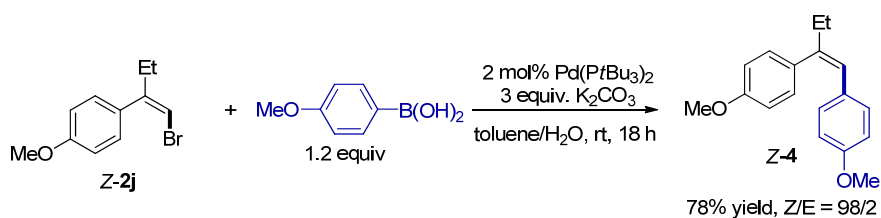

To a 10-mL reaction tube was added 4-methoxyphenylboronic acid (18.2 mg, 0.12 mmol, 1.2 eq.),  $\text{K}_2\text{CO}_3$  (41.5 mg, 0.3 mmol, 3 eq.) and  $\text{Pd}(\text{P}t\text{Bu}_3)_2$  (1.0 mg, 0.002 mmol, 0.02 eq.). The tube was sealed and degassed with nitrogen for 3 times. Next, Z-2j (24.1 mg, 0.1 mmol, 1.0 eq.) (Z/E = 97/3) in 1.0 mL toluene and 0.1 mL  $\text{H}_2\text{O}$  was added via syringe. The resulting solution was allowed to stir at rt for 21 h. After the reaction was completed,  $\text{H}_2\text{O}$  (3 mL) was added. The mixture was extracted with  $\text{CH}_2\text{Cl}_2$  (3 x 10 mL), washed with brine (10 mL) and dried over  $\text{Mg}_2\text{SO}_4$ . After concentration of the organic phase, the crude residue was purified by column chromatography to yield Z-4 as a colourless oil (21 mg, 78%, Z/E = 98/2).

$^1\text{H}$  NMR (400 MHz,  $\text{CDCl}_3$ )  $\delta$  7.09 (d,  $J$  = 8.7 Hz, 2H), 6.91-6.83 (m, 4H), 6.65 (d,  $J$  = 8.8 Hz, 2H), 6.34 (s, 1H), 3.82 (s, 3H), 3.73 (s, 3H), 2.47 (qd,  $J$  = 7.4, 1.0 Hz, 2H), 1.06 (t,  $J$  = 7.4 Hz, 3H).

### Z-1-methoxy-4-(6-phenylhex-3-en-5-yn-3-yl)benzene (**Z-5**)

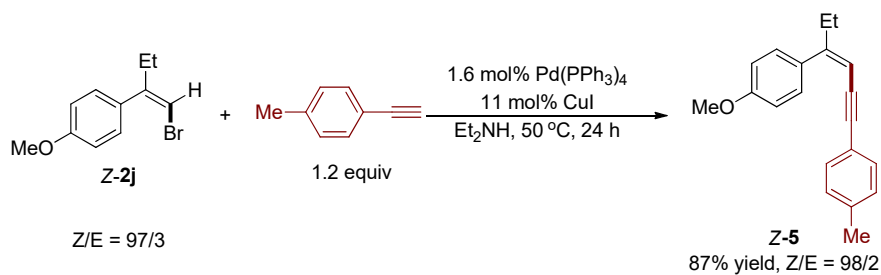

To a 10-mL round bottom flask was added **Z-2j** (48.2 mg, 0.2 mmol, 1.0 eq.), Pd(PPh<sub>3</sub>)<sub>4</sub> (3.7 mg, 0.003 mmol, 0.016 eq.) and copper(I) iodide (4.2 mg, 0.022mmol, 0.11 eq.). The flask was sealed, degassed with nitrogen for 3 times, and 1.0 mL Et<sub>2</sub>NH was added via syringe. Phenylacetylene (25.6 mg, 0.22mmol, 1.1 eq.) in 1.0 mL Et<sub>2</sub>NH was added. Then, the temperature was raised to 50 °C and the resulting solution was allowed to stir for 18 h. After the reaction was completed (as monitored by TLC analysis), the reaction mixture was diluted with H<sub>2</sub>O (5 mL) and the pH was adjusted to 7.0 with HCl (1 M). The mixture was extracted with CH<sub>2</sub>Cl<sub>2</sub> (3 x 15 mL), washed with brine (15 mL), dried over Mg<sub>2</sub>SO<sub>4</sub> and concentrated in vacuo. The crude residue was purified by column chromatography to yield **Z-5** as a colorless oil (48.5 mg, 88%, Z/E = 98/2)

<sup>1</sup>H NMR (400 MHz, CDCl<sub>3</sub>) δ 7.64 (d, *J* = 8.8 Hz, 2H), 7.23 (d, *J* = 8.1 Hz, 2H), 7.09 (d, *J* = 7.9 Hz, 2H), 6.93 (d, *J* = 8.8 Hz, 2H), 5.76 (s, 1H), 3.85 (s, 3H), 2.57 (qd, *J* = 7.3, 0.8 Hz, 1H), 2.34 (s, 3H), 1.09 (t, *J* = 7.4 Hz, 3H).



### UV/visible absorption spectra of quinolizinium compounds

The UV-Vis absorption spectra of photocatalysts **3a-3f** were reported in *Chem. Sci.*, 2017, **8**, 7537–7544. The UV-Vis absorption spectrum of photocatalyst **3h** was reported in *Org. Biomol. Chem.*, 2021, **19**, 8507–8515. The UV-Vis absorption spectra of photocatalysts **3g** and **3i** were measured by Jenway 6850 UV-Vis Spectrophotometer, and the final concentration of each quinolizinium compound in CH<sub>2</sub>Cl<sub>2</sub> was  $1 \times 10^{-5}$  M.

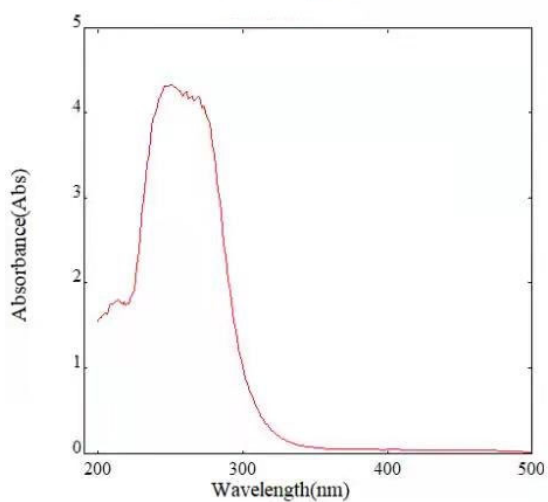

Figure S1 Absorption spectrum of compound **3g**.

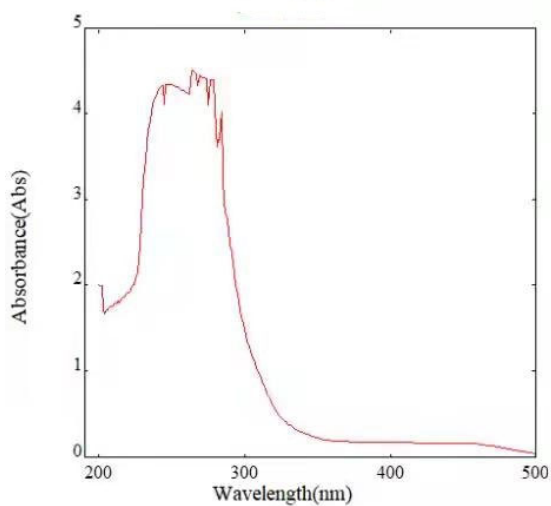

Figure S2 Absorption spectrum of compound **3i**.

## Use of white LEDs light source

We conducted the experiment by changing the blue LEDs light to white LEDs light. Only

*E*-arylvinyl halide was obtained through decarboxylation/halogenations.

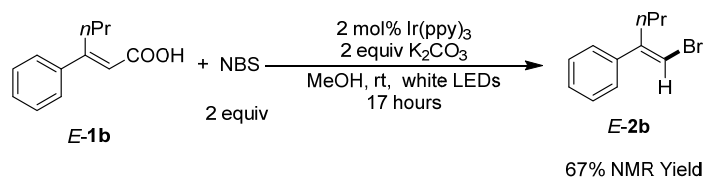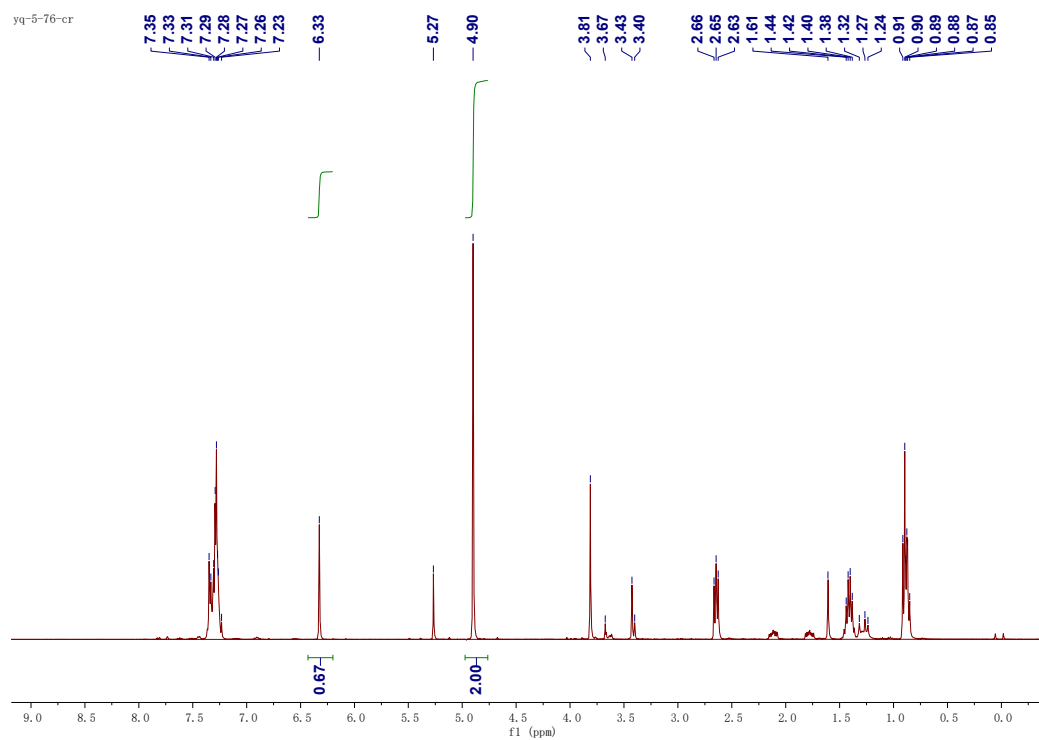

yq-4-138-H

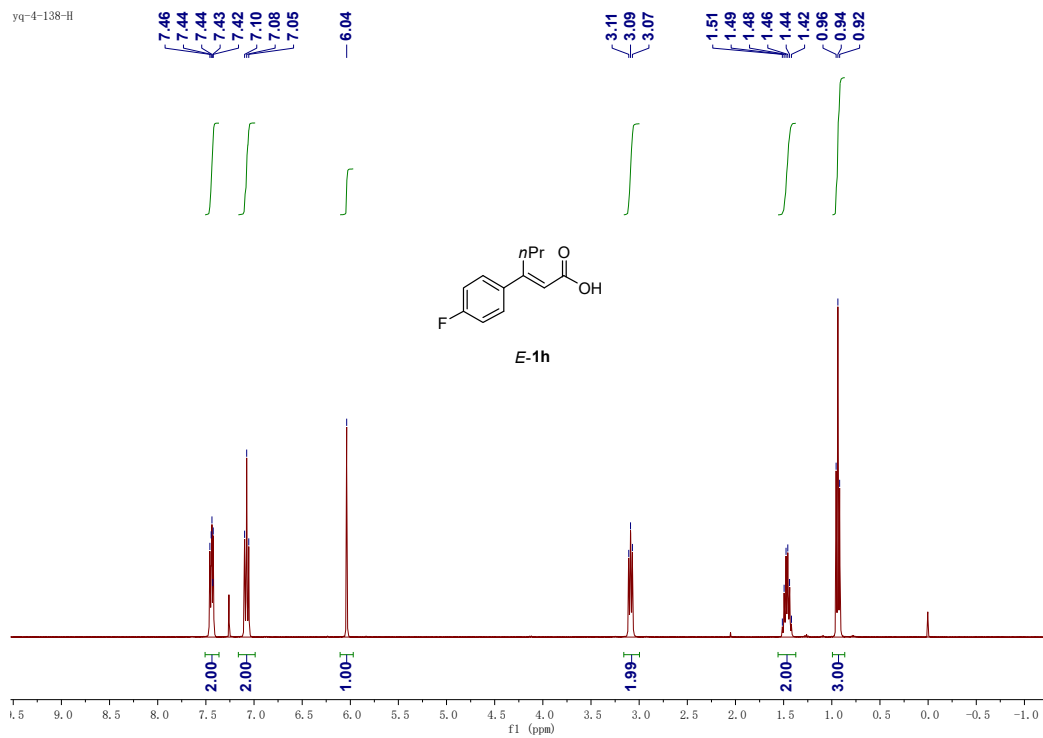

yq-4-138-c

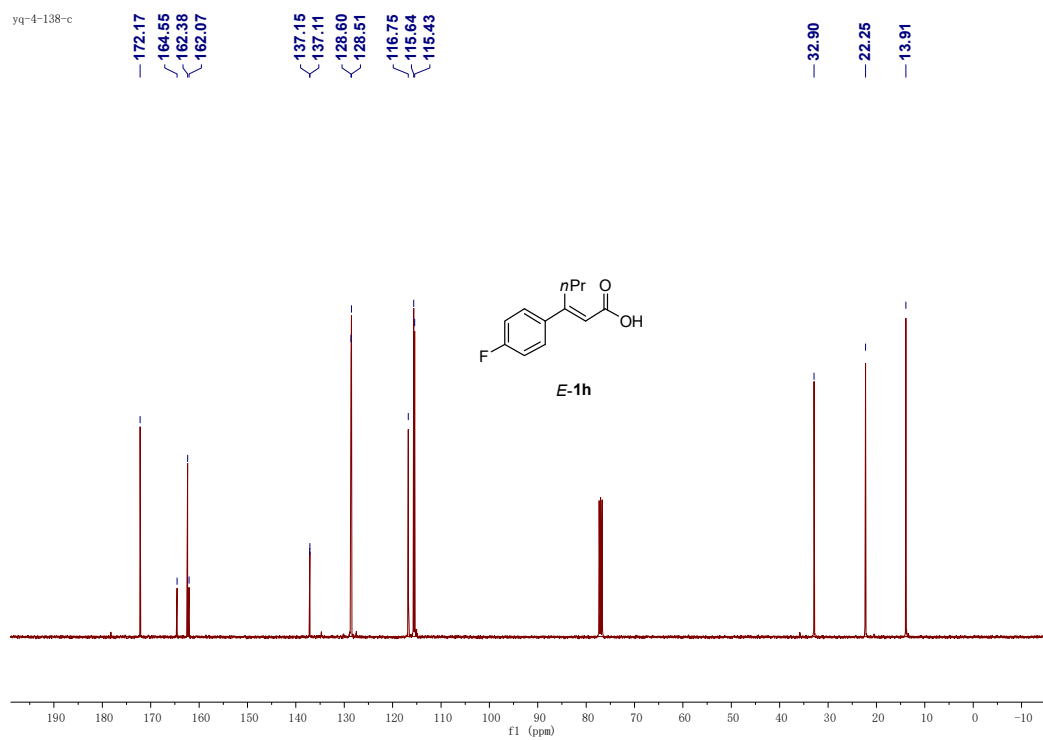

yq-4-138-f

— 112.10

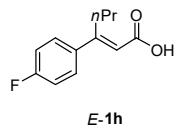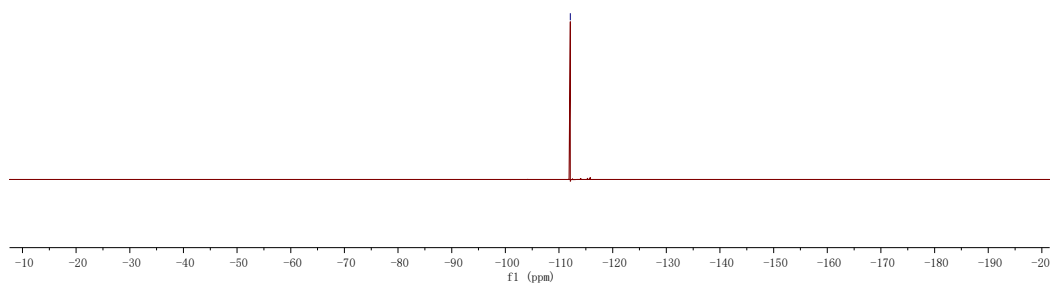

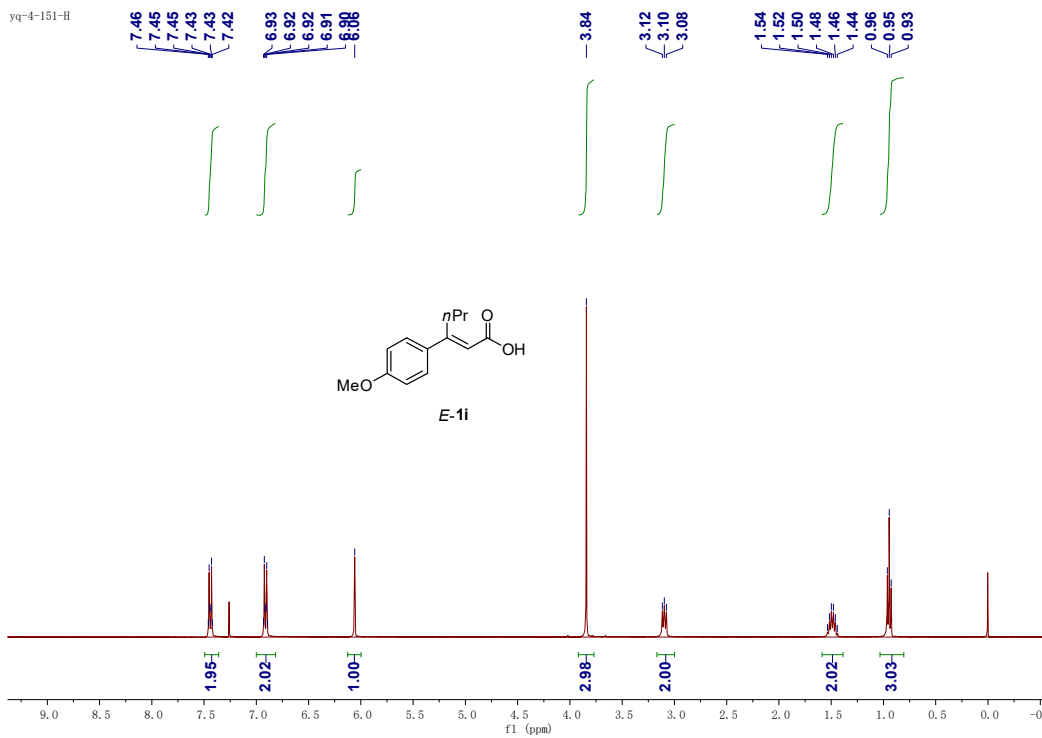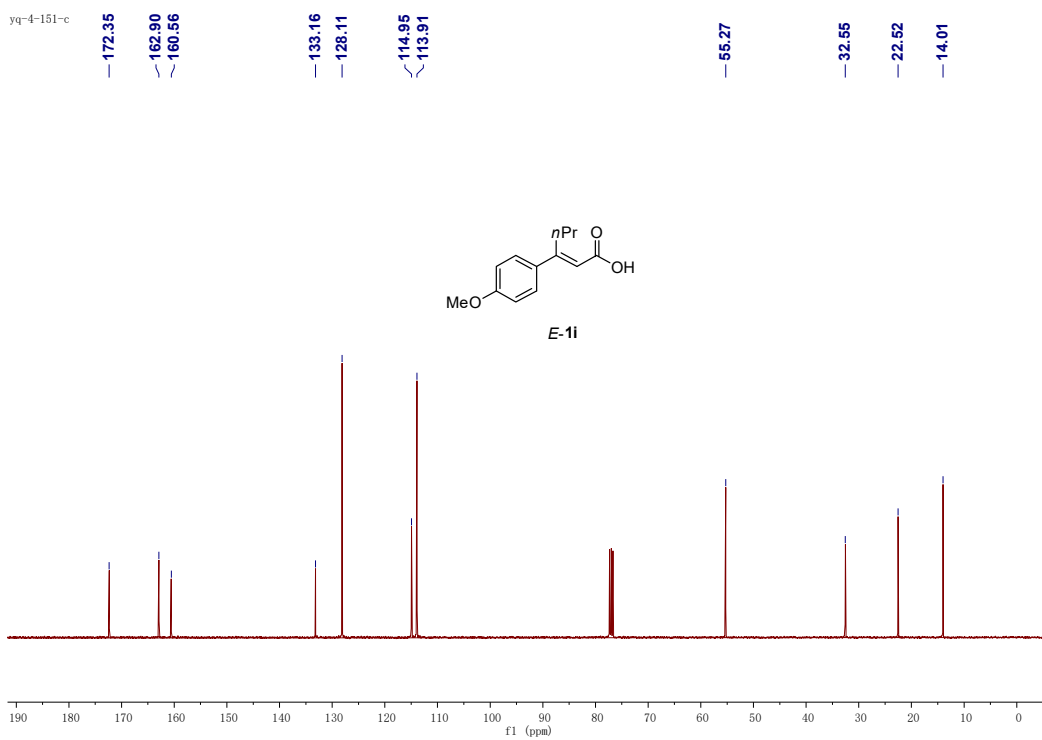

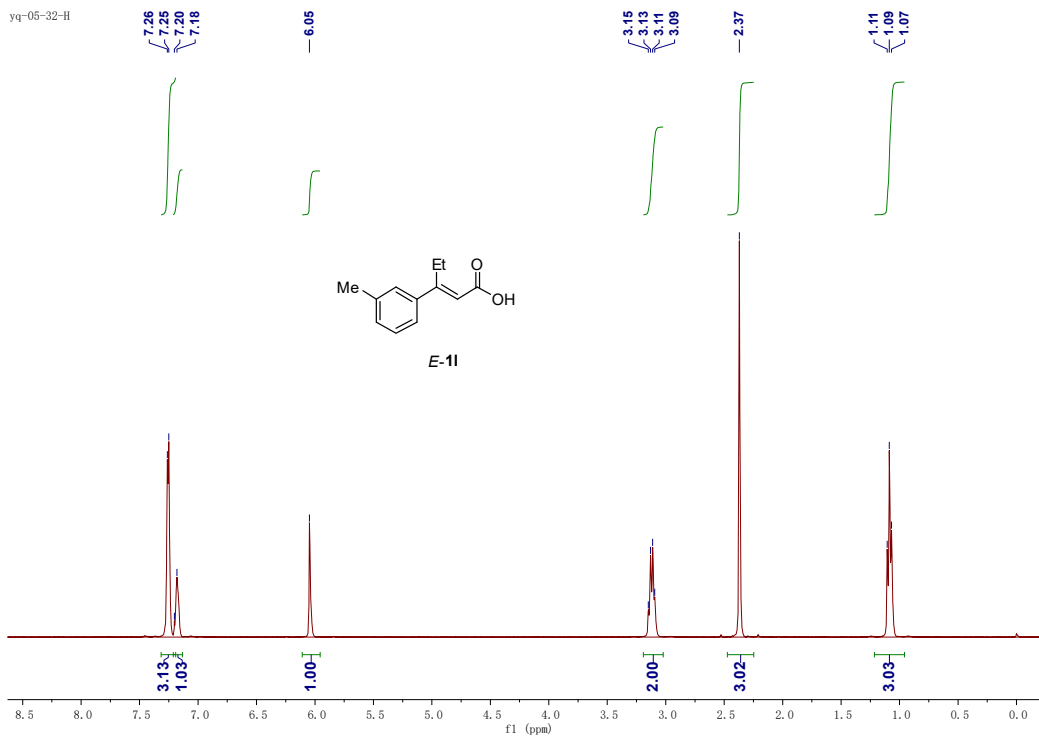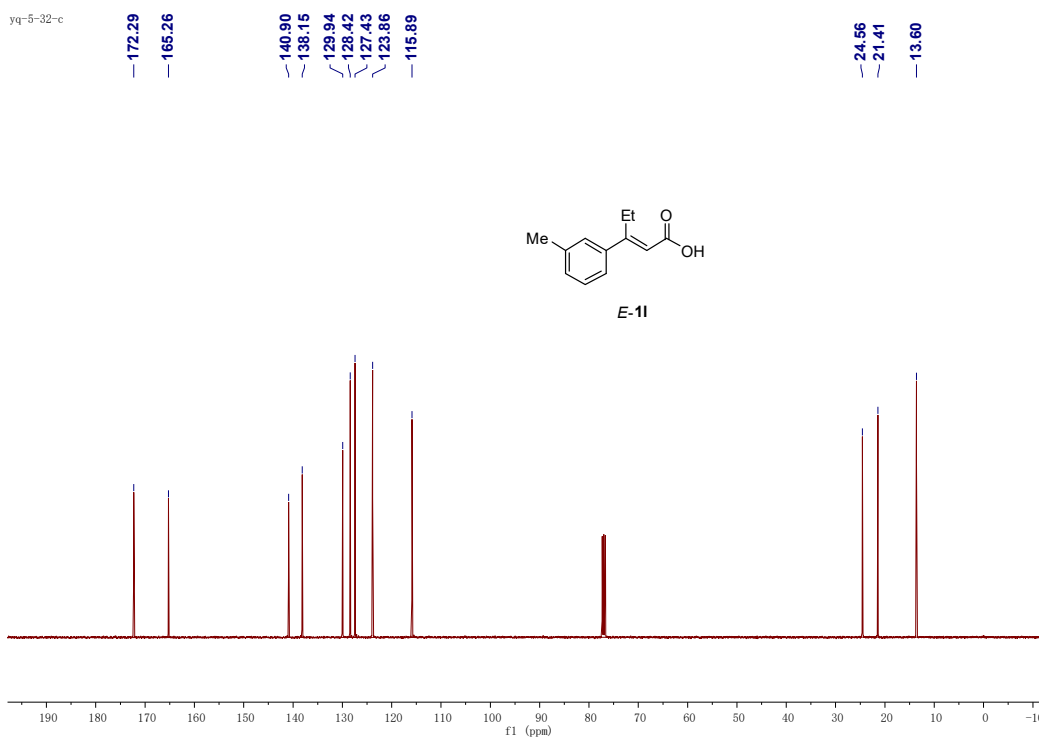

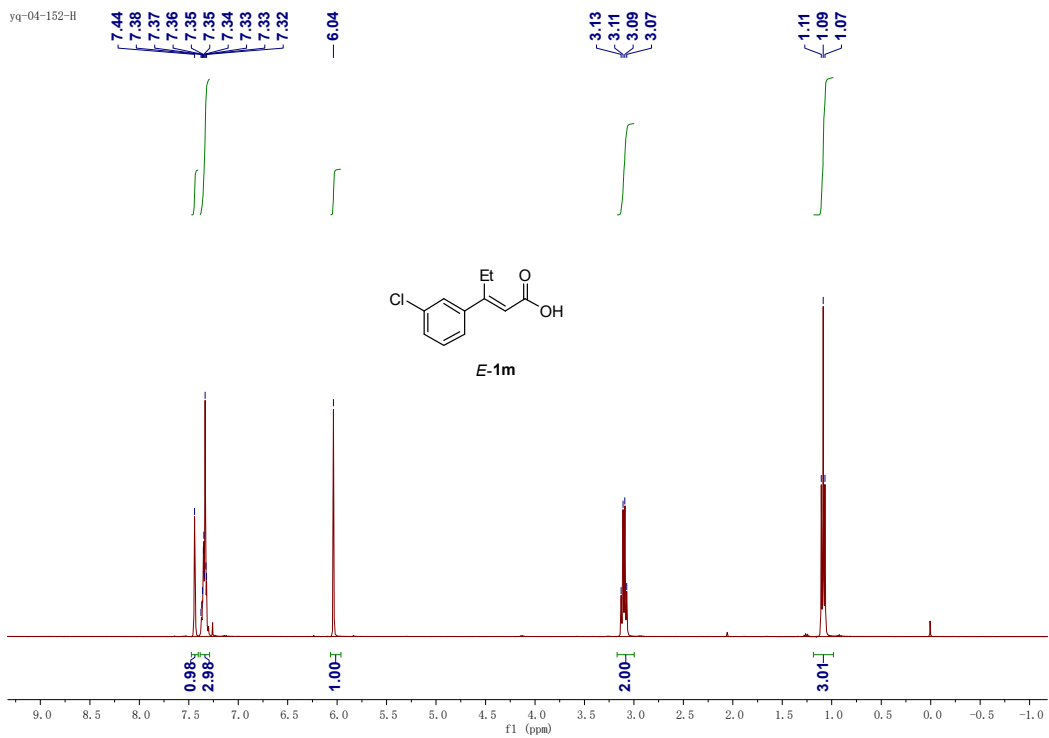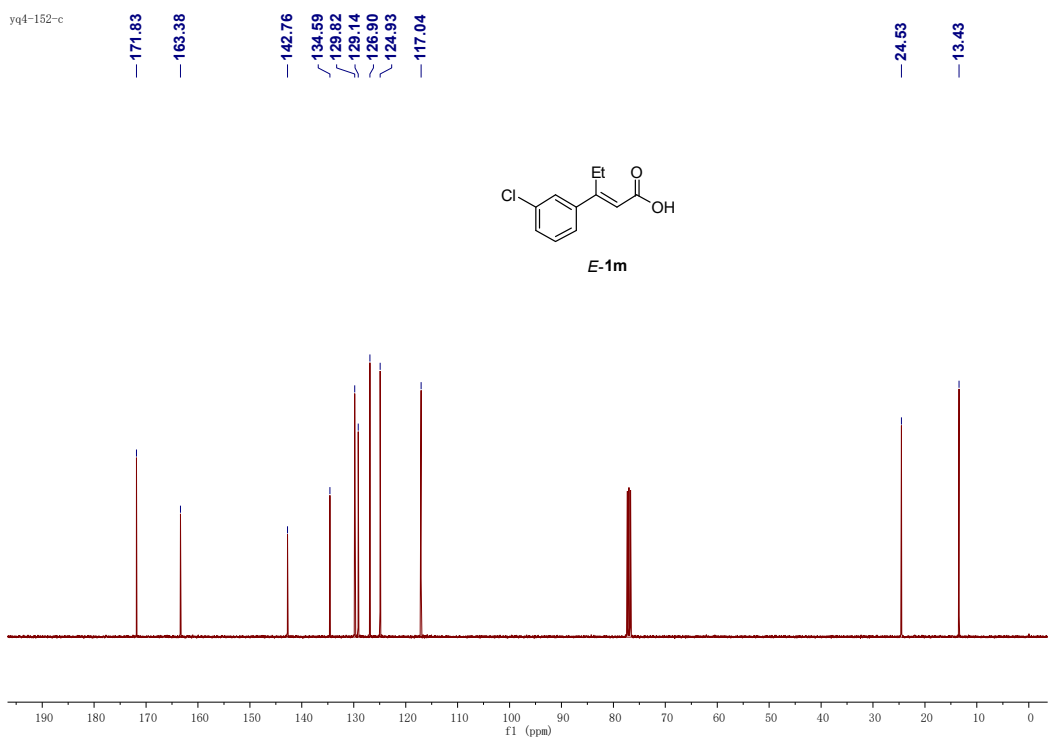

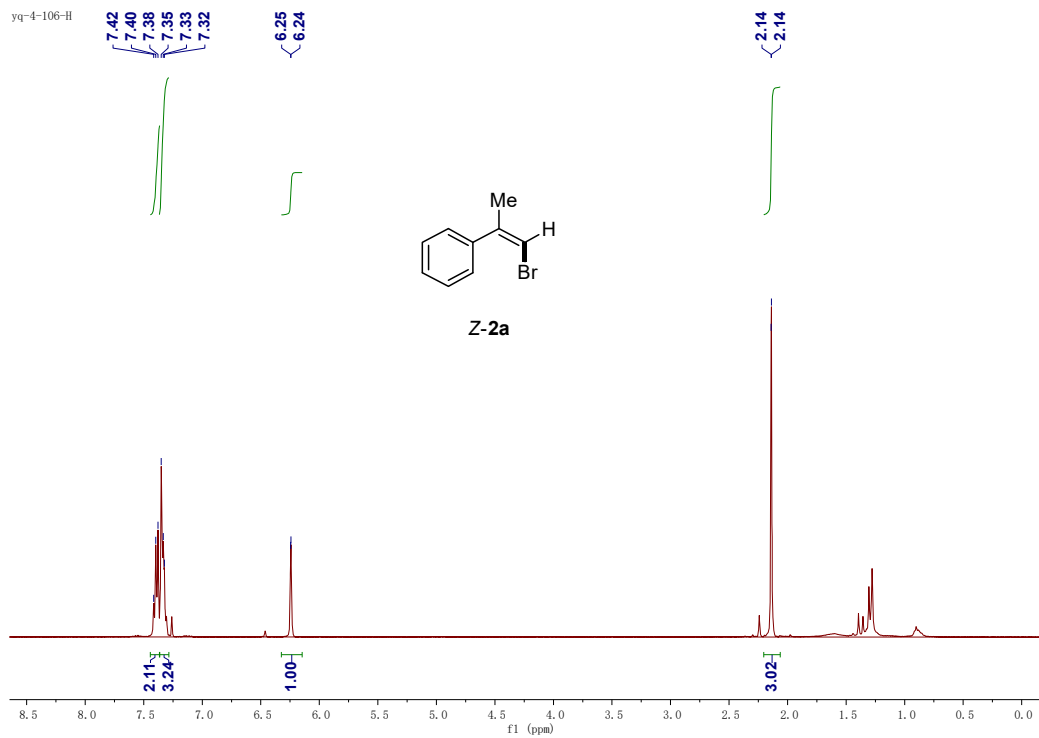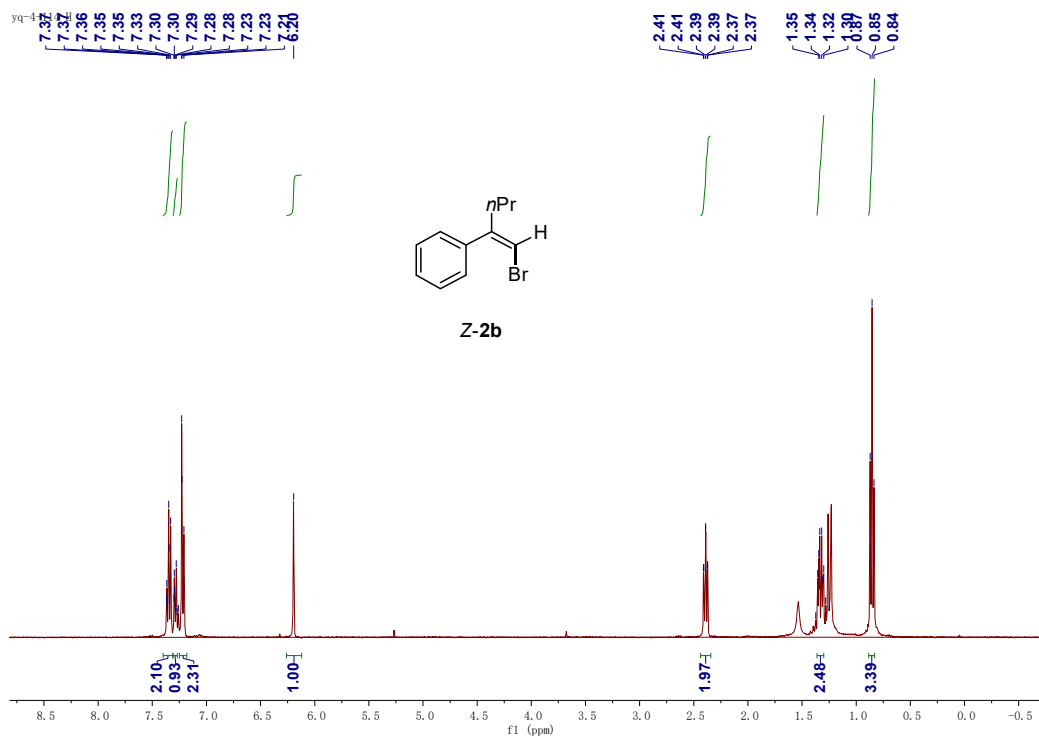



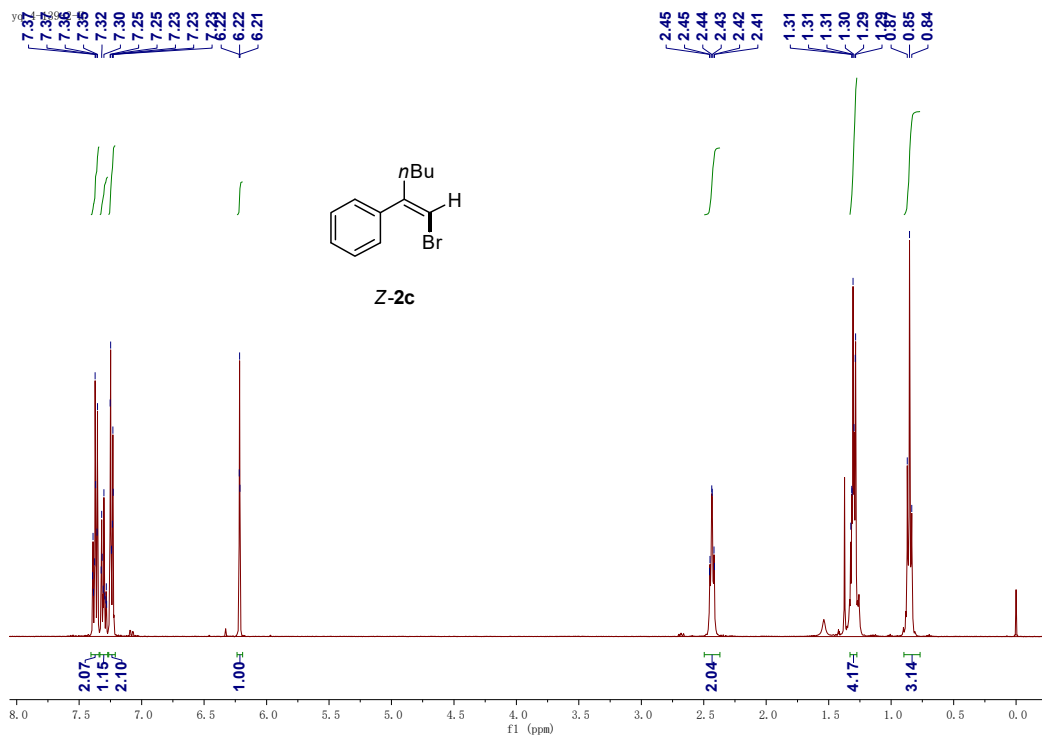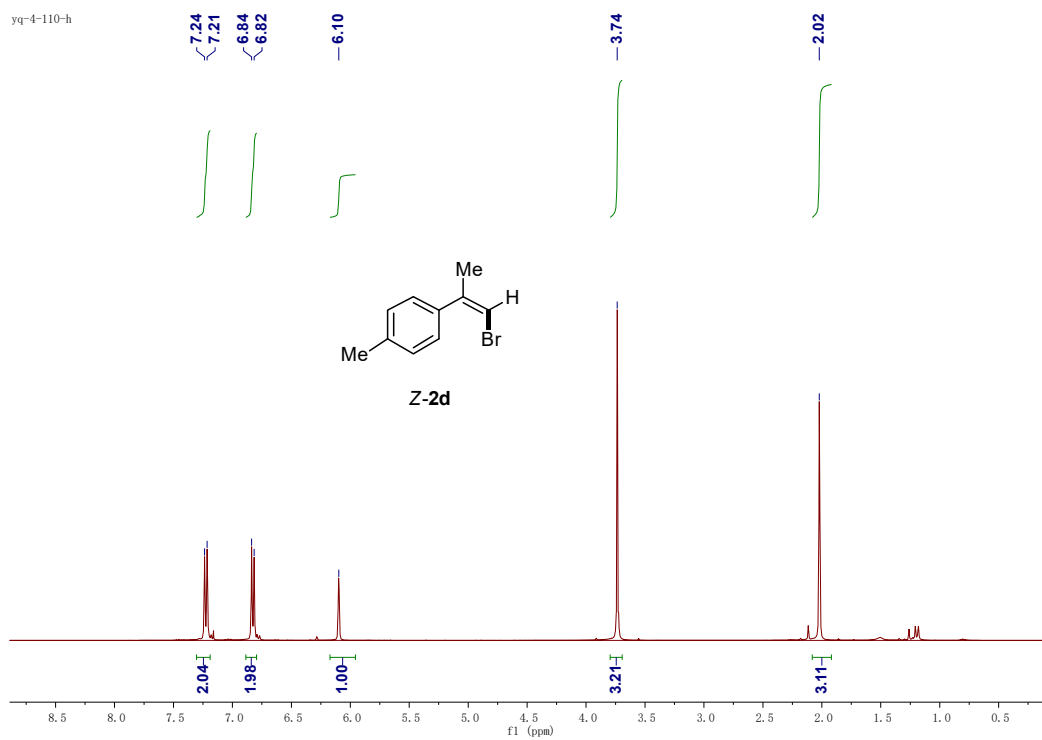

yq-4-110-c

—158.91 —140.78 —132.22 —128.94 —113.45 —100.79 —55.17 —24.91

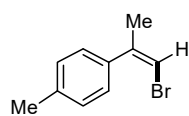

Z-2d

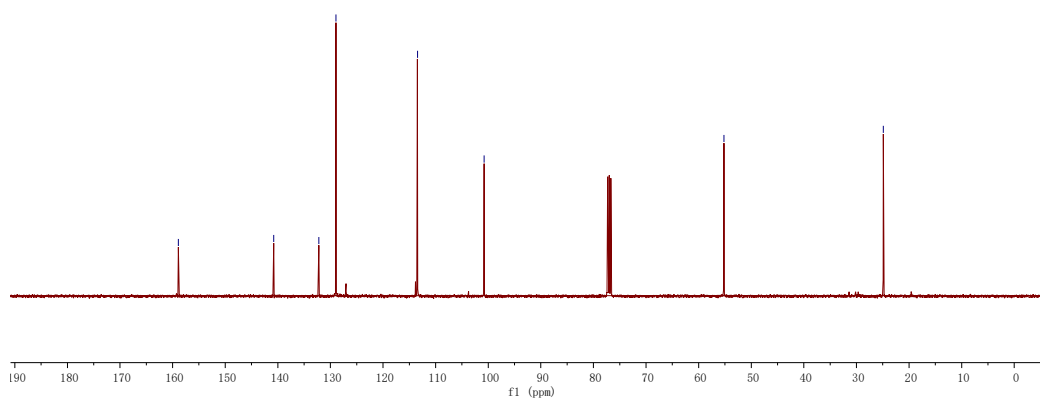

yq-4-125-H2

7.67 7.65 7.65 7.62 7.60 7.51 7.49 7.47 7.44 7.41 7.39 7.38 —6.30 —2.20

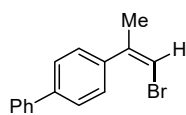

Z-2e

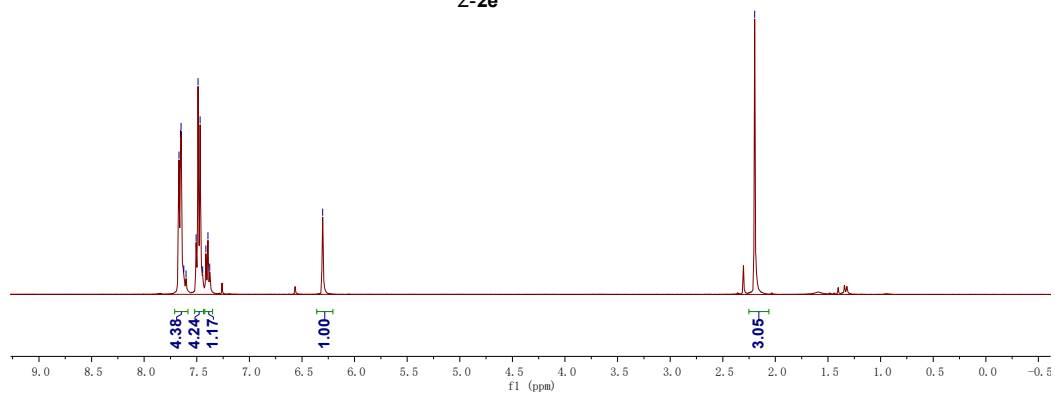

yq-4-125

140.96  
140.62  
140.39  
138.92  
128.73  
128.41  
127.33  
126.81

101.56

24.87

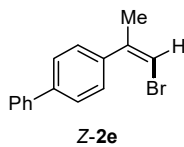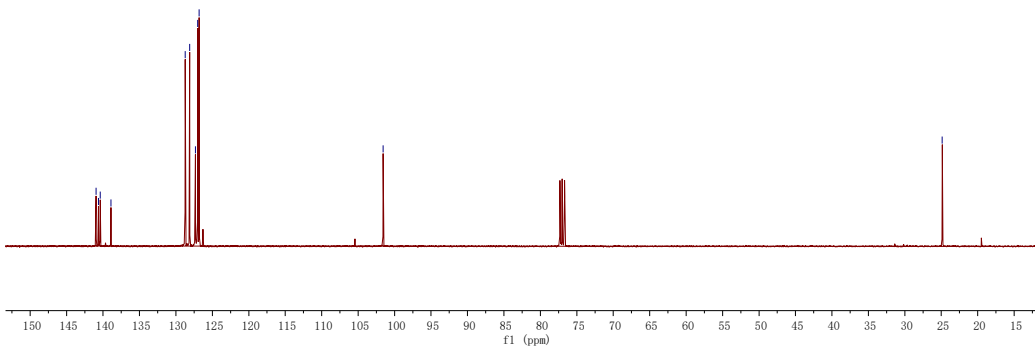

yq-4-127-H2

7.52  
7.50  
7.22  
7.20

6.25  
6.25

2.11  
2.10

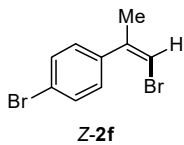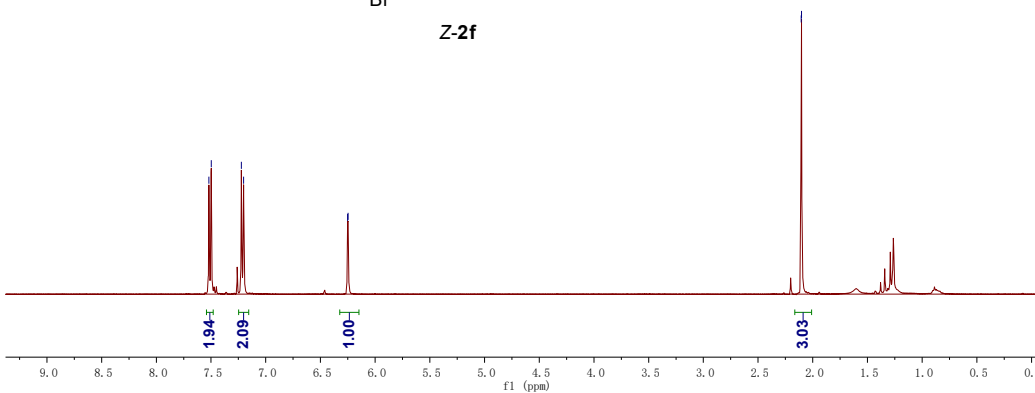

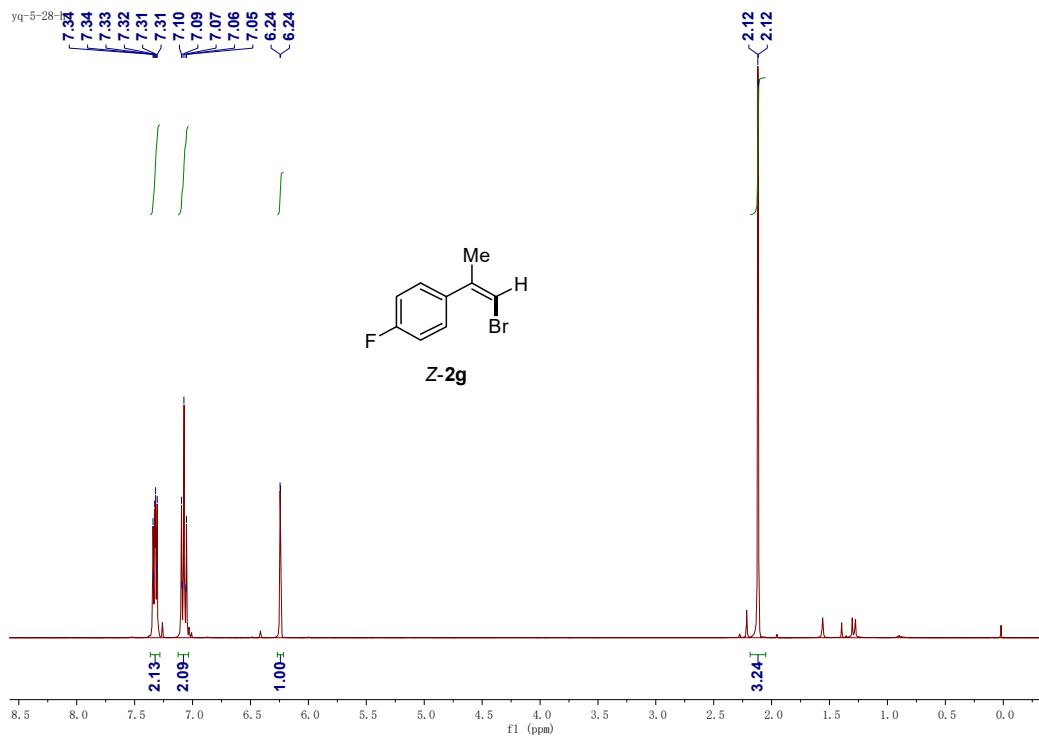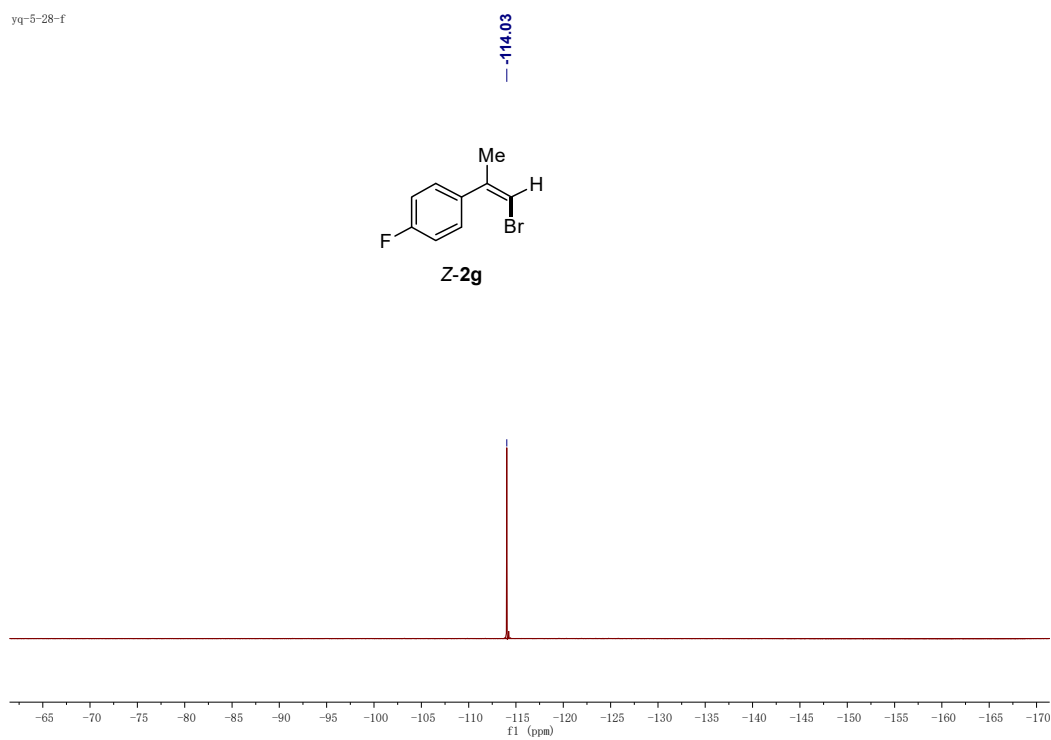

yq-5-28-c-2

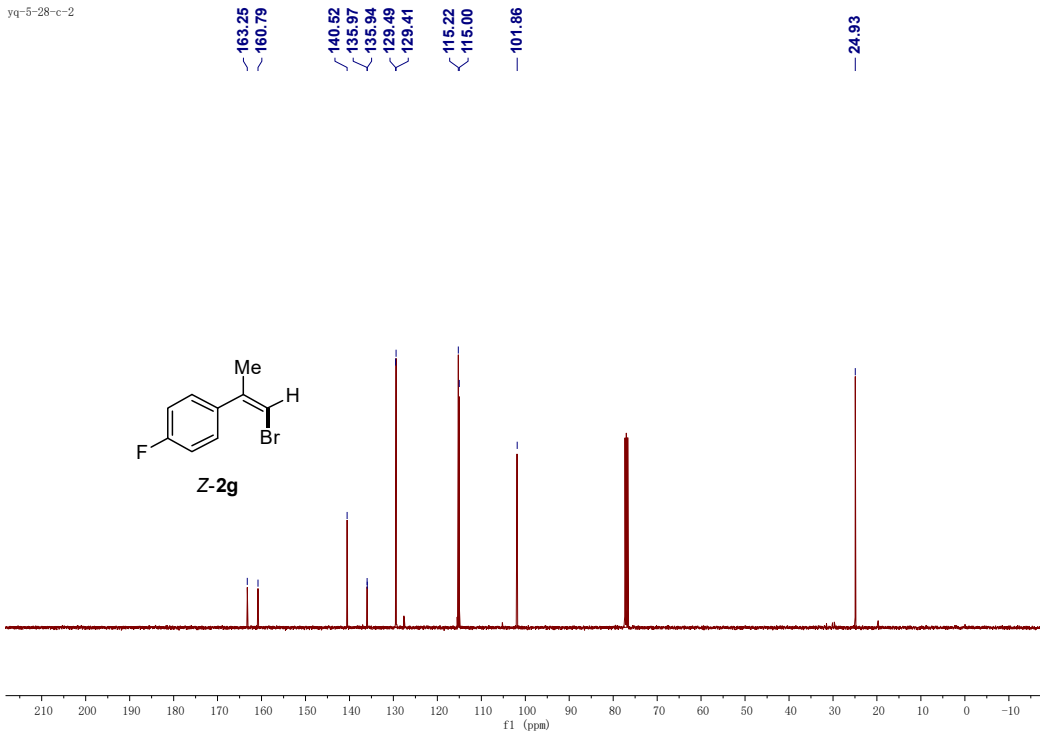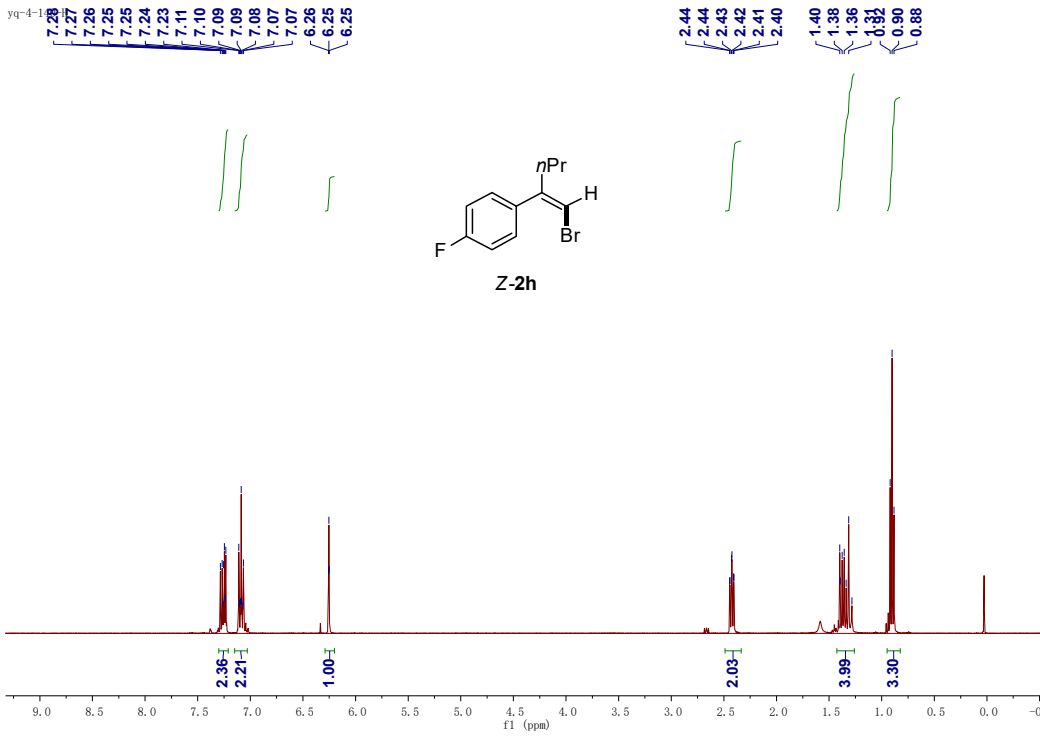

yq-4-140c

163.24  
160.79

145.41

135.23

135.19

129.81

129.73

115.27

115.05

102.39

40.86

20.76

13.33

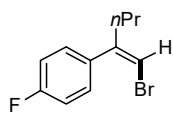

Z-2h

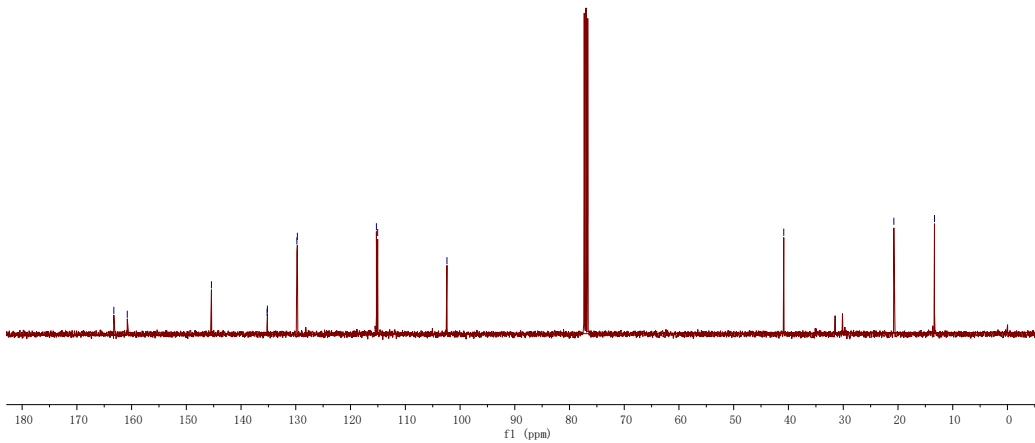

yq-4-140

114.38

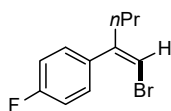

Z-2h

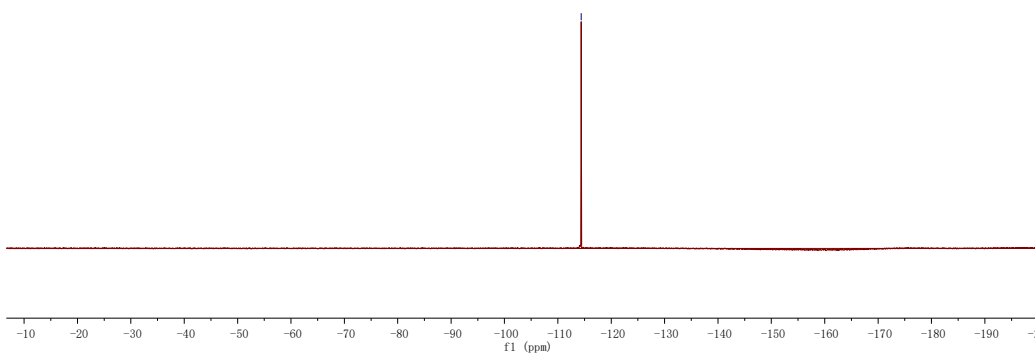

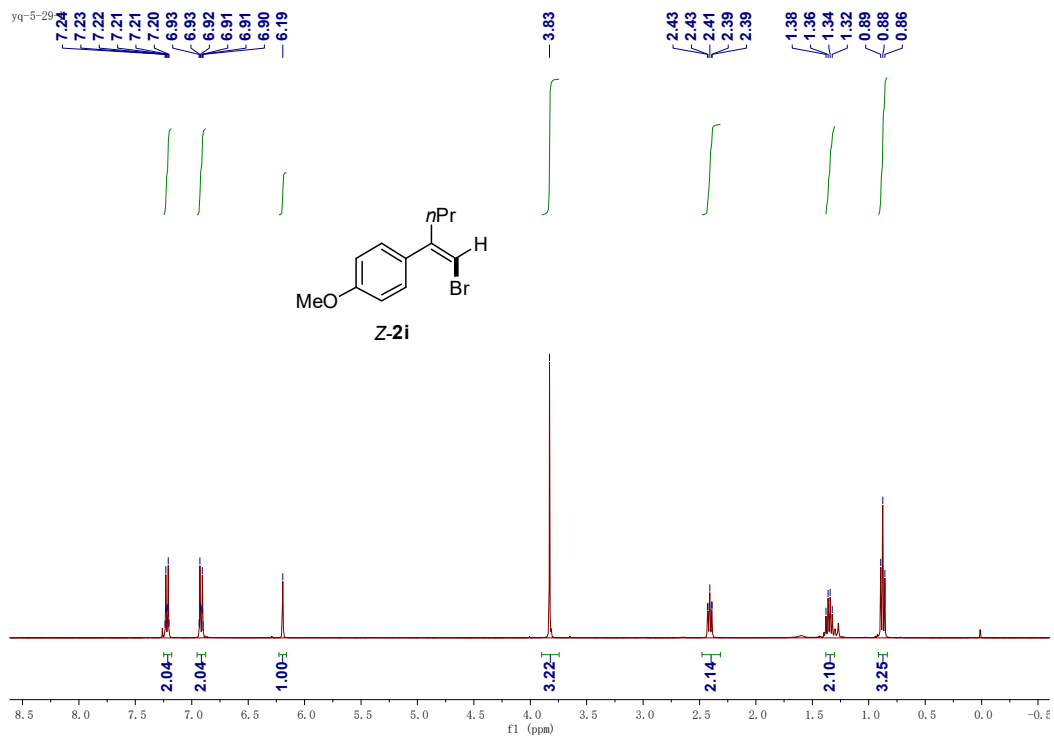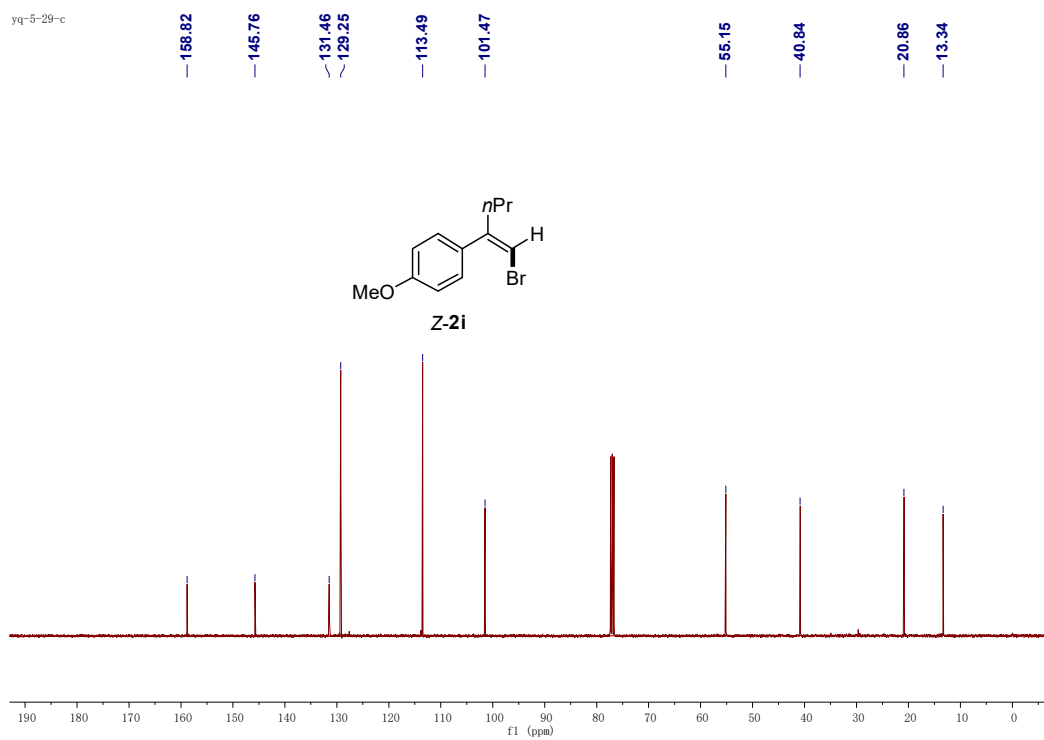

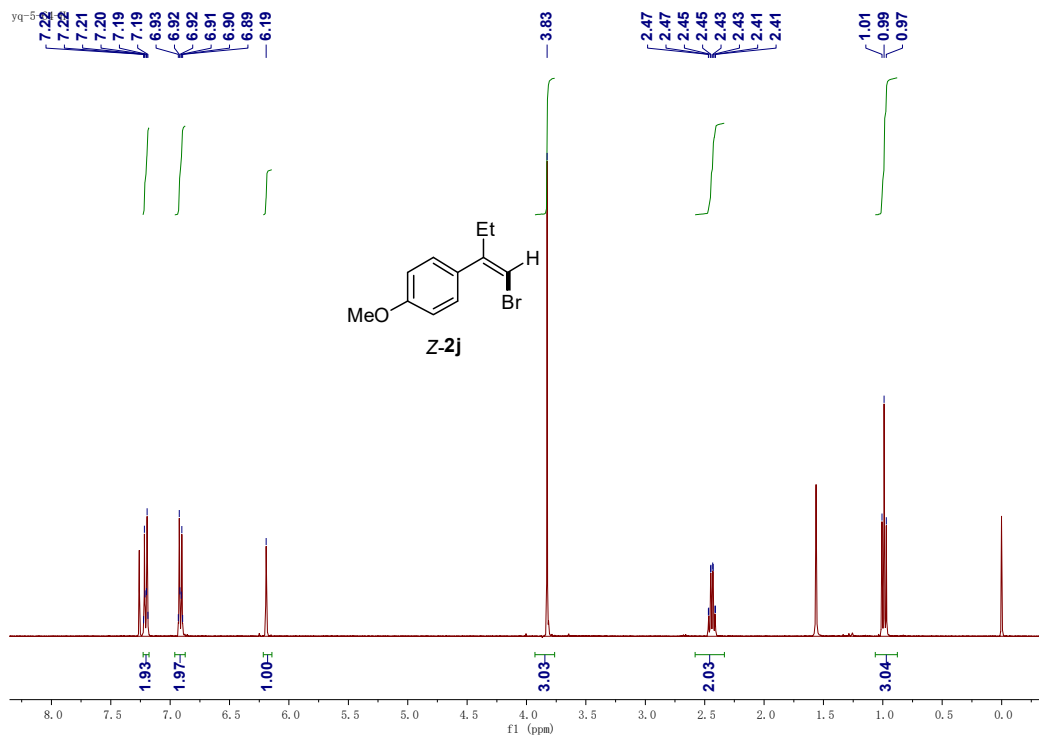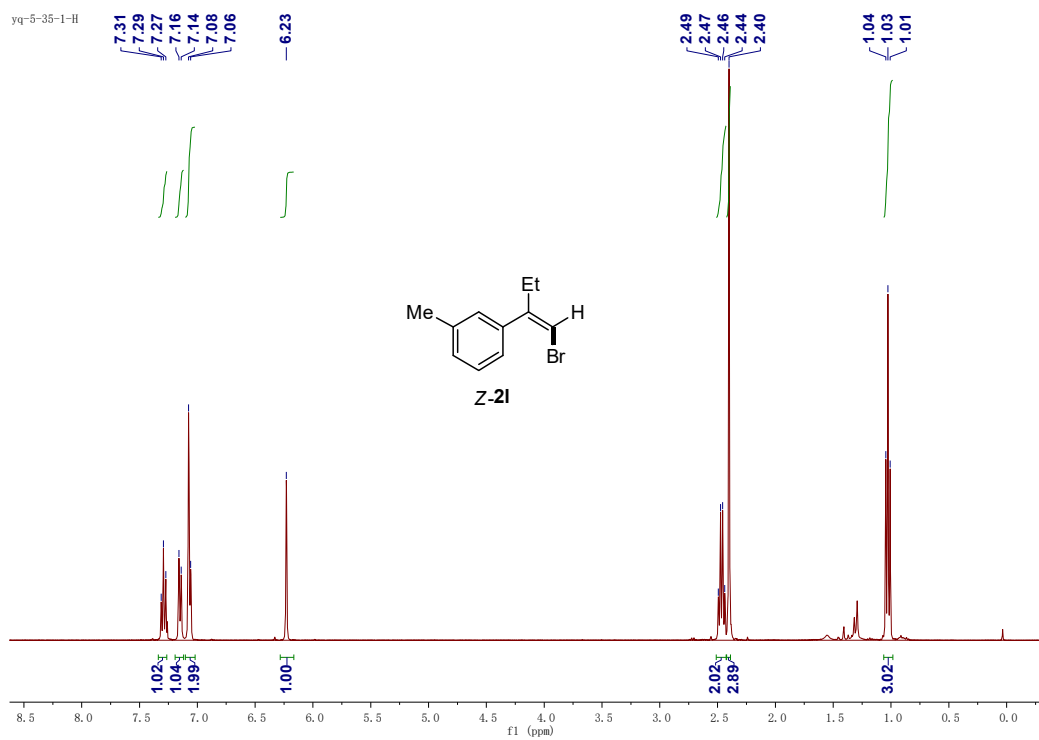



yq-5-35-1-c

148.14  
139.56  
137.71  
128.46  
128.21  
128.01  
125.05

101.30

32.12

21.44

12.68

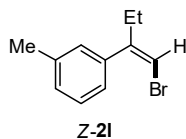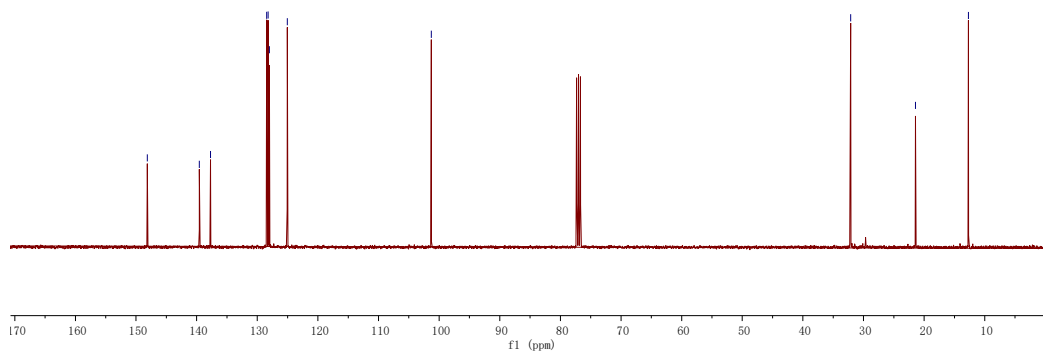

yq-5-33-H

7.33  
7.31  
7.30  
7.28  
7.23  
7.13  
7.11

6.25

2.46  
2.44  
2.42  
2.40

1.02  
1.00  
0.98

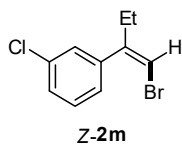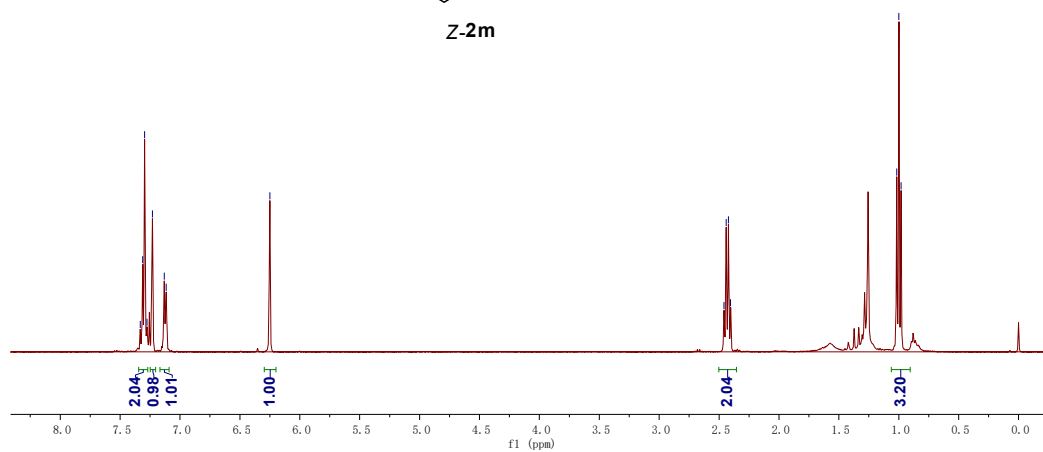

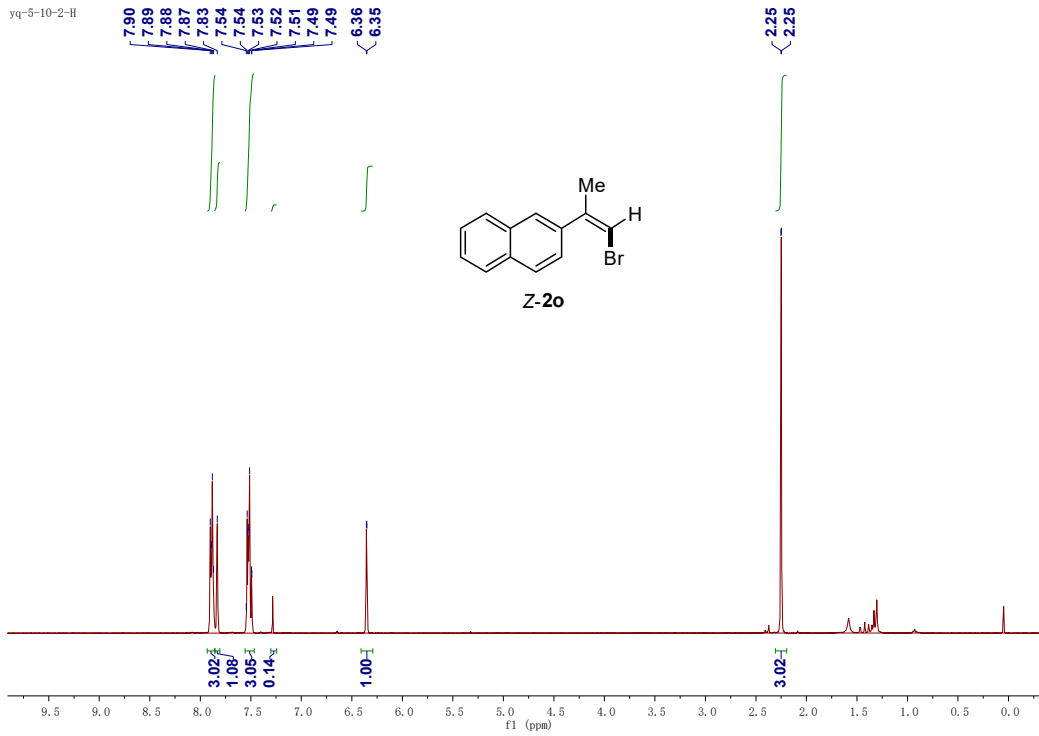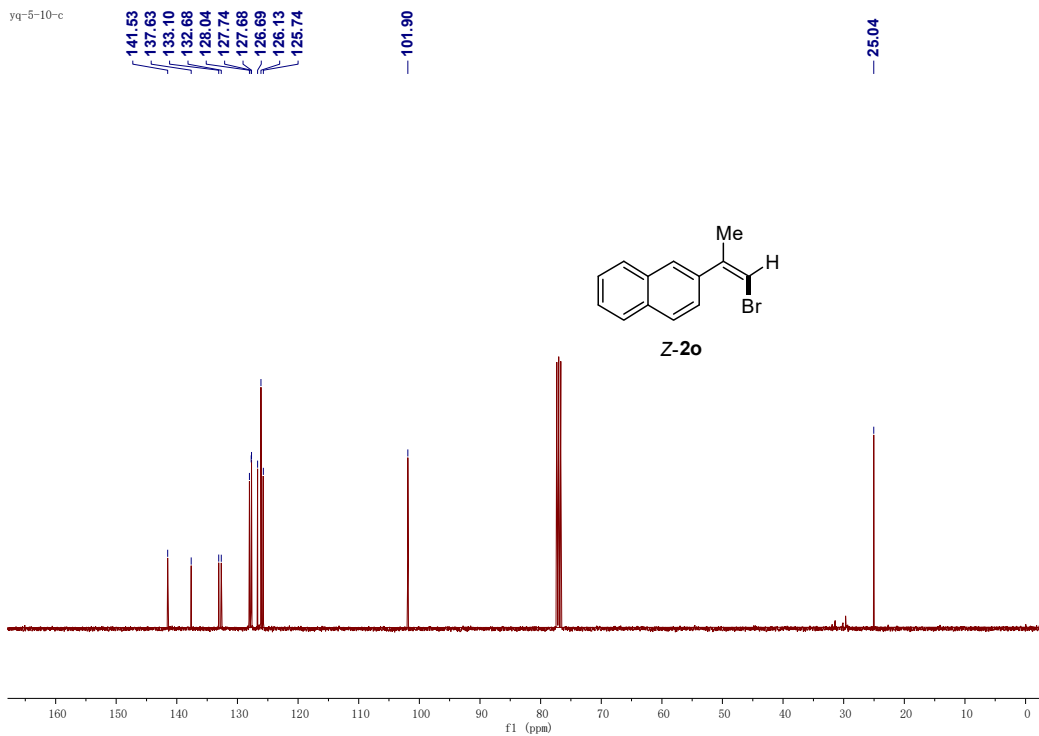

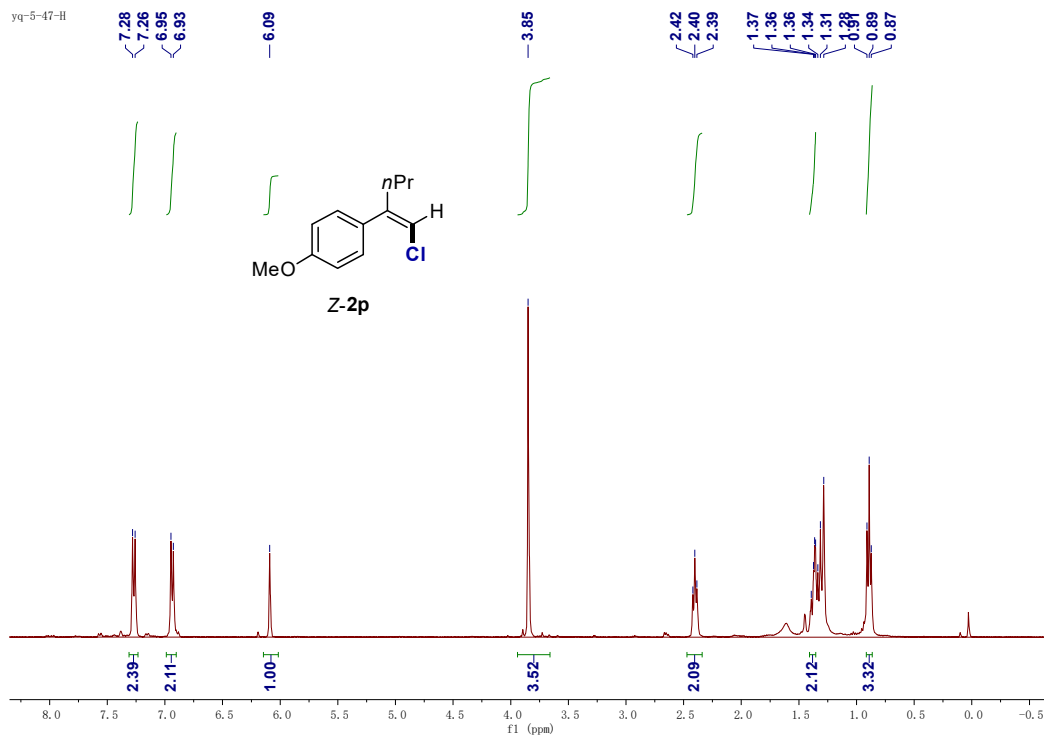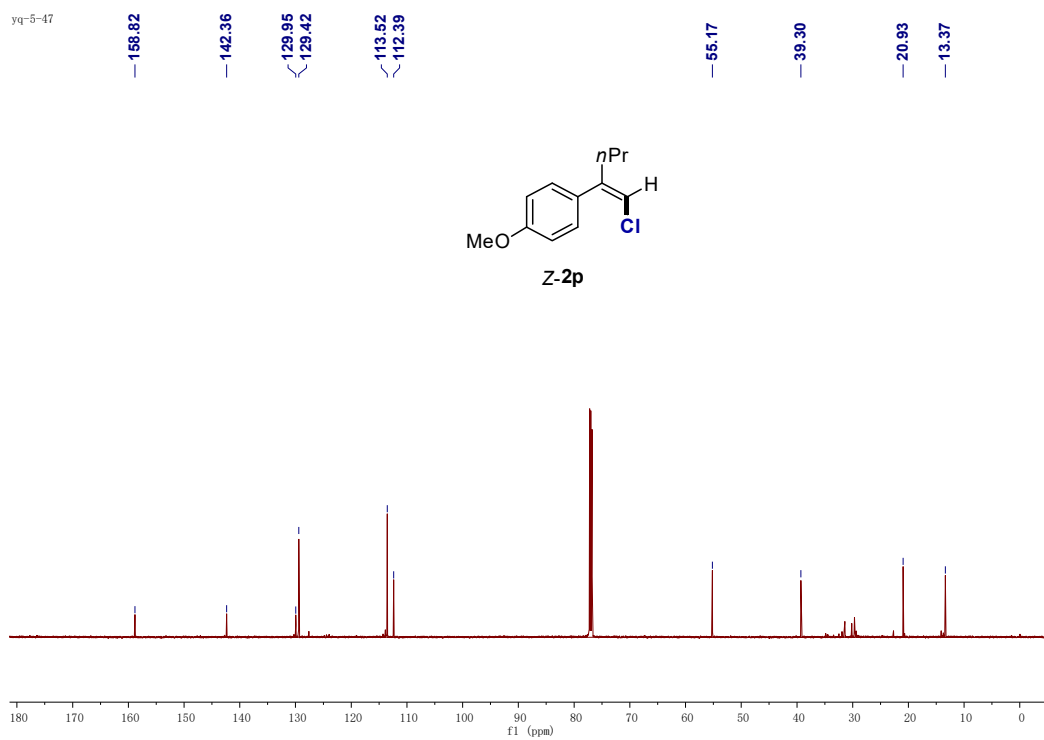

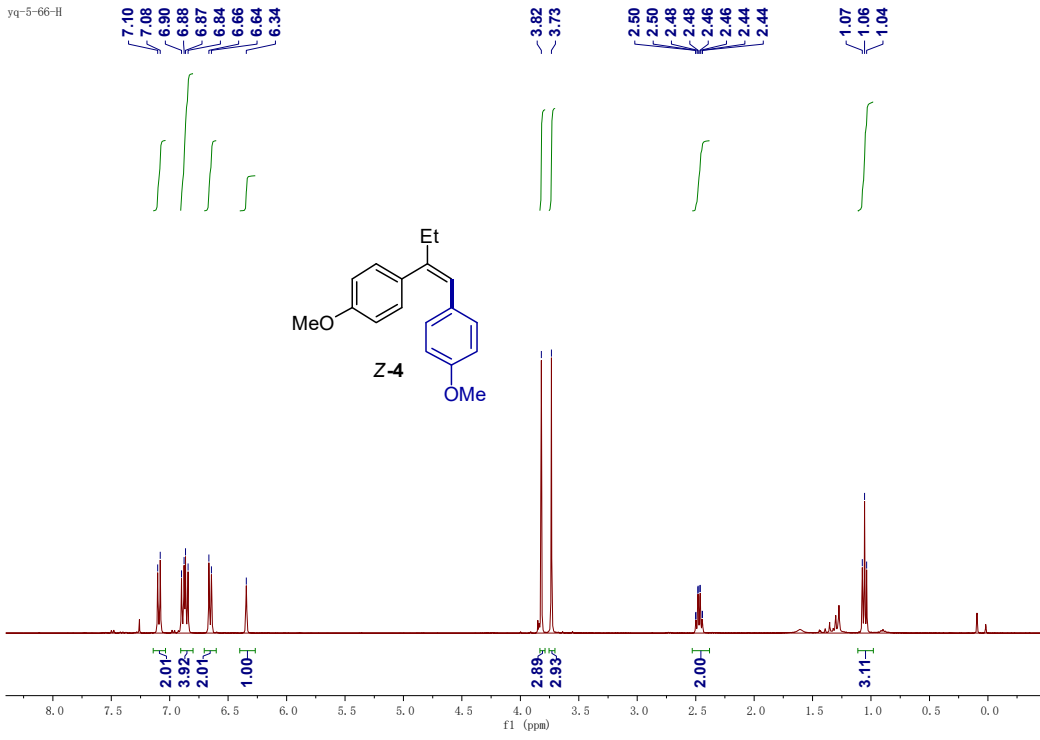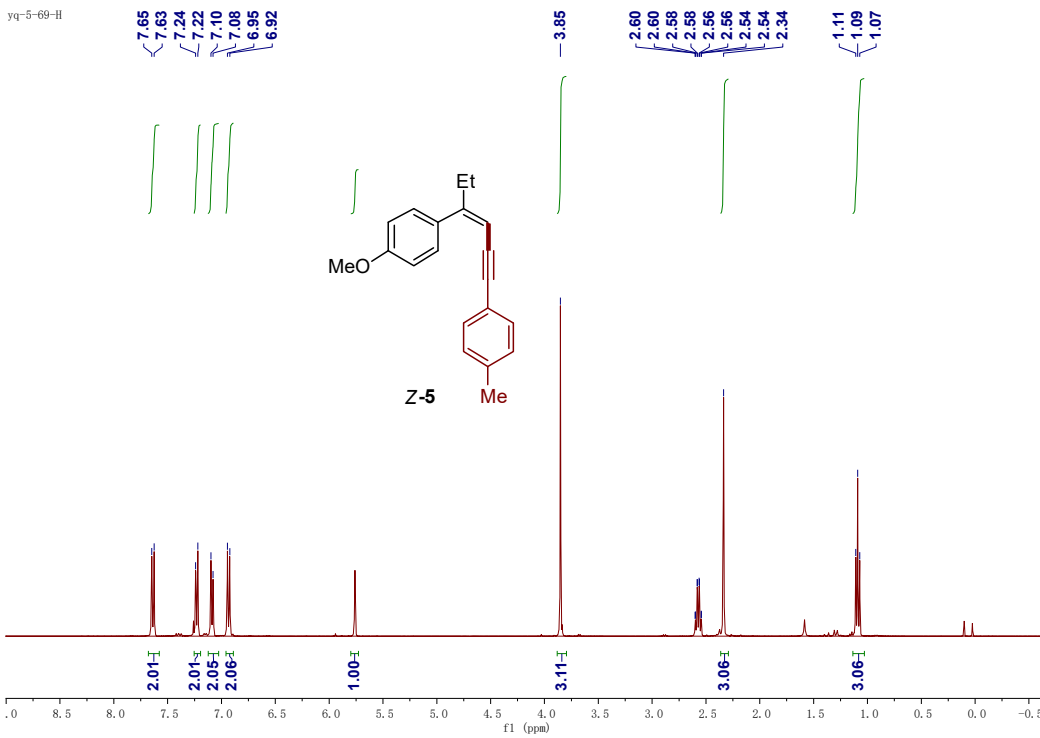

Supplement: d1ra08753c1.pdf [file d1ra08753c1.pdf]
